# Supplementary material for: Association of sedentary behaviour patterns with dietary and lifestyle habits among public school teachers: a cross-sectional study
Source: PubMed Central journal article supplement — BMJ Open. 2020 Jan 23;10(1):e034322. doi: 10.1136/bmjopen-2019-034322 (PMC7045133; doi:10.1136/bmjopen-2019-034322), 2020-01-23
Supplement: bmjopen-2019-034322.draft_revisions.pdf [file bmjopen-2019-034322.draft_revisions.pdf]

# BMJ Open

BMJ Open is committed to open peer review. As part of this commitment we make the peer review history of every article we publish publicly available.

When an article is published we post the peer reviewers' comments and the authors' responses online. We also post the versions of the paper that were used during peer review. These are the versions that the peer review comments apply to.

The versions of the paper that follow are the versions that were submitted during the peer review process. They are not the versions of record or the final published versions. They should not be cited or distributed as the published version of this manuscript.

BMJ Open is an open access journal and the full, final, typeset and author-corrected version of record of the manuscript is available on our site with no access controls, subscription charges or pay-per-view fees (<http://bmjopen.bmj.com>).

If you have any questions on BMJ Open's open peer review process please email [info.bmjopen@bmj.com](mailto:info.bmjopen@bmj.com)

# BMJ Open

## Association of sedentary behavior patterns with eating and lifestyle habits among public school teachers

|                               |                                                                                                                                                                                                                                                                                                                                                                                                                                                                                                                                                                                                                                                                                                                                                                                                                                                                                                                                                                                                                                                      |
|-------------------------------|------------------------------------------------------------------------------------------------------------------------------------------------------------------------------------------------------------------------------------------------------------------------------------------------------------------------------------------------------------------------------------------------------------------------------------------------------------------------------------------------------------------------------------------------------------------------------------------------------------------------------------------------------------------------------------------------------------------------------------------------------------------------------------------------------------------------------------------------------------------------------------------------------------------------------------------------------------------------------------------------------------------------------------------------------|
| Journal:                      | <i>BMJ Open</i>                                                                                                                                                                                                                                                                                                                                                                                                                                                                                                                                                                                                                                                                                                                                                                                                                                                                                                                                                                                                                                      |
| Manuscript ID                 | bmjopen-2019-034322                                                                                                                                                                                                                                                                                                                                                                                                                                                                                                                                                                                                                                                                                                                                                                                                                                                                                                                                                                                                                                  |
| Article Type:                 | Original research                                                                                                                                                                                                                                                                                                                                                                                                                                                                                                                                                                                                                                                                                                                                                                                                                                                                                                                                                                                                                                    |
| Date Submitted by the Author: | 14-Sep-2019                                                                                                                                                                                                                                                                                                                                                                                                                                                                                                                                                                                                                                                                                                                                                                                                                                                                                                                                                                                                                                          |
| Complete List of Authors:     | <p>Delfino, Leandro; Universidade Estadual Paulista Julio de Mesquita Filho Faculdade de Ciencias e Tecnologia Campus de Presidente Prudente</p> <p>Tebar, William ; Universidade Estadual Paulista Julio de Mesquita Filho Faculdade de Ciencias e Tecnologia Campus de Presidente Prudente, Physical Education</p> <p>Gil, Fernanda; Universidade Estadual Paulista Julio de Mesquita Filho Faculdade de Ciencias e Tecnologia Campus de Presidente Prudente</p> <p>De Souza, Jefferson; Universidade Estadual Paulista Julio de Mesquita Filho Faculdade de Ciencias e Tecnologia Campus de Presidente Prudente</p> <p>Romanzini, Marcelo; Universidade Estadual de Londrina, Physical Education</p> <p>Fernandes, Romulo; Universidade Estadual Paulista Julio de Mesquita Filho Faculdade de Ciencias e Tecnologia Campus de Presidente Prudente, Physical Education</p> <p>Christofaro, Diego; Universidade Estadual Paulista Julio de Mesquita Filho Faculdade de Ciencias e Tecnologia Campus de Presidente Prudente, Physical Education</p> |
| Keywords:                     | Sedentarism, Breaks, Foods, Physical Activity                                                                                                                                                                                                                                                                                                                                                                                                                                                                                                                                                                                                                                                                                                                                                                                                                                                                                                                                                                                                        |
|                               |                                                                                                                                                                                                                                                                                                                                                                                                                                                                                                                                                                                                                                                                                                                                                                                                                                                                                                                                                                                                                                                      |

SCHOLARONE™  
Manuscripts

1  
2  
3 Original Article  
4

5  
6 **Association of sedentary behavior patterns with eating and lifestyle habits among**  
7 **public school teachers**  
8

9 Leandro Dragueta Delfino<sup>1,2</sup> ([ledragueta@hotmail.com](mailto:ledragueta@hotmail.com))

10 William Rodrigues Tebar <sup>1,2</sup> ([william.tebar@hotmail.com](mailto:william.tebar@hotmail.com))

11  
12  
13  
14 Fernanda Caroline Staquecini Gil Tebar <sup>3</sup> ([feernanda\\_gil@hotmail.com](mailto:feernanda_gil@hotmail.com))

15  
16 Jefferson Marinho de Souza<sup>3</sup> ([jefferson.msouza@hotmail.com](mailto:jefferson.msouza@hotmail.com))

17  
18 Marcelo Romanzini<sup>4</sup> ([mromanzini@uel.br](mailto:mromanzini@uel.br))

19  
20 Rômulo Araújo Fernandes<sup>1,2,3</sup> ([romulo@fct.unesp.br](mailto:romulo@fct.unesp.br))

21  
22  
23  
24 Diego Giulliano Destro Christofaro<sup>1,2,3\*</sup> ([diego@fct.unesp.br](mailto:diego@fct.unesp.br))  
25

26  
27 <sup>1</sup> São Paulo State University (Unesp), School of Technology and Science, Physical  
28 Education Department, Presidente Prudente, São Paulo, Brazil.

29  
30  
31  
32 <sup>2</sup> Post-graduation Program in Movement Sciences, São Paulo State University – Unesp.  
33

34  
35  
36 <sup>3</sup> Sao Paulo State University (Unesp), Physiotherapy Department, Post-Graduation  
37 Program in Physiotherapy, Presidente Prudente, São Paulo, Brazil.  
38

39  
40  
41 <sup>4</sup> State University of Londrina (UEL), Physical Education Department, Physical  
42 Education and Sport Center, Presidente Prudente, São Paulo, Brazil.  
43  
44

45  
46 \*Corresponding author

47 E-mail: [diego.christofaro@unesp.br](mailto:diego.christofaro@unesp.br)

48 Rua Roberto Simonsen, 305 CEP: 19060-900 - P. Prudente, SP +55018981019340.  
49

50  
51  
52  
53 Word count: 4.194 words.  
54  
55  
56  
57  
58  
59  
60

## ABSTRACT

**Objectives:** To verify the existence, even in predominantly orthostatic work, therefore in light physical activity, of association of sedentary behaviors and its breaks with lifestyle variables (eating habits, physical activity and alcohol consumption) in teachers.

**Design:** Cross-sectional study. **Participants:** In total, 245 teachers (186 women and 59 men) were randomly selected to participate in the study. **Primary and secondary outcome measure:** Sedentary behavior was evaluated by screen time in different devices on the questionnaires provided by Sedentary Behavior Research Network and Physical Activities was assessed by questionnaire in three different domains (work/occupational, sports/gym, and leisure time) and in total PA. Lifestyle variables and cofounding factors were self-reported. **Results:** Teachers with high sedentary behavior showed lower chances of consuming white meat (OR=0.44[CI=0.24-0.79]) and greater chances of high alcohol consumption (OR=1.96[CI=1.17-3.28]). Teachers with more interruptions in sedentary behavior at work presented greater chances of consuming cereals (OR=2.49[CI=1.05-5.92]) and being moderately (OR=2.60[CI=1.28-5.28]) or sufficiently physically active (OR=2.57[CI=1.14-5.77]). Those with more interruptions in sedentary behavior in leisure time demonstrated higher chances of fruit (OR=2.33[CI=1.28-4.23]) and vegetable consumption (OR=1.91[CI=1.05-3.49]), as well as being physically active (OR=2.34[CI=1.03-5.35]). **Conclusion:** High sedentary behavior was associated with inadequate eating habits. Individuals with greater interruptions in this behavior were more likely to present adequate eating habits and be physically active.

**Keywords:** Sedentarism; Breaks; Foods; Physical Activity.

## ARTICLE SUMMARY

### Strengths and limitations of this study

#### Limitations:

- This study has a cross-sectional design that does not allow cause and effect inference.
- The use of a questionnaire to assess the level of physical activity and sedentary behavior did not allow a more robust assessment.

#### Strengths:

- We highlight the random sample, as well as the sample size of teachers, and the control of the variables by confounding factors in the analyses between sedentary behavior, physical activity and lifestyle variables.
- The evaluation of physical activity addressing different domains in teachers, and considering the different domains of breaks in sedentary behavior.
- Teachers work with a non-sedentary physical activity profile, and are categorized as moderately active in their work functions. It has been observed that physically active jobs can be associated with increased sitting time during leisure, however the relationship between occupation type and sedentary behavior outside work needs further research to understand these associations. Thus, one of the novelties of the present study was to contemplate in the same research the relation between sedentary behavior and breaks in sedentary time with lifestyle variables in teachers.

## INTRODUCTION

Nowadays, people spend much of their awake time on sedentary activities, resulting in increased sitting time, whether during work, transportation, or leisure (Chastin et al., 2015)<sup>1</sup>. Sedentary behavior is defined as any activity characterized by an energy expenditure equal to or less than 1.5 metabolic equivalents and performed in a seated, reclined, or lying posture (Compernelle et. al, 2016)<sup>2</sup>.

Estimates from the World Health Organization (WHO, 2008)<sup>3</sup> highlight that 3.2 million people worldwide die prematurely each year because of a sedentary lifestyle. The adult population spends around one-third to one-half of the day in a seated position, as well as spending prolonged hours of leisure on screen activities such as watching TV, using computers, participating in screen-based recreation, or driving (Nam et al., 2016)<sup>4</sup>.

It is considered that sedentary behavior can be evaluated in three ways: 1) checking for specific behaviors, such as television time; 2) quantification of sedentary time in a specific domain (work, leisure, or transportation); 3) total time allocated to all manifestations of sedentary behavior throughout the day (Healy et al., 2011)<sup>5</sup>. A large proportion of daily sedentary behaviors are accumulated in the work scenario; studies have observed that office workers spend at least two-thirds of their working hours seated (Thorp et al., 2012; Ryan et al., 2011)<sup>6-7</sup> and with technological advances, sitting has become the normative stance (Hadgraft et al., 2015)<sup>8</sup>. Changing the profile of people from sedentary to active through small attitude changes, such as interruptions from sedentary behaviors to light activities, whether walking down the corridor to talk to co-workers or extending the distance walking to the restroom, can lead to important health benefits (Owen et al., 2010)<sup>9</sup>.

Despite the recurrent concern with work in which individuals remain largely seated, there is doubt as to how sedentary behavior manifests in the life of subjects who

1  
2  
3 carry out a profession which includes predominantly non-sedentary activities. Teachers  
4 represent a considerable professional category in Brazil, with more than 2.6 million  
5 teachers in basic and higher education (Vedovato & Monteiro, 2014)<sup>10</sup>. The work of the  
6 teacher involves a considerable physical load, since teachers remain in the orthostatic  
7 position for 95% of activities performed (Cardoso et al., 2009)<sup>11</sup>. In addition, the  
8 outstanding physical effort of teaching activities, coupled with biomechanical factors  
9 present in repetitive demand activities and developed in ergonomically inadequate  
10 environments, explain the complex nature of the teaching professional's role (Dias et al.,  
11 2017)<sup>12</sup>. Teachers work with a non-sedentary physical activity profile (Vaz & Bharathi,  
12 2004)<sup>13</sup>, and are categorized as moderately active in their work functions (Farahmand et  
13 al., 2000)<sup>14</sup>.

14  
15 It has been observed that physically active jobs can be associated with increased  
16 sitting time during leisure, however the relationship between occupation type and  
17 sedentary behavior outside work needs further research to understand these associations  
18 (Saidj et al., 2015)<sup>15</sup>. Thus, one of the novelties of the present study was to contemplate  
19 in the same research the relation between sedentary behavior and breaks in sedentary  
20 time with lifestyle variables in teachers.

21  
22 Therefore, the objective of this study was to verify the association of sedentary  
23 behavior and breaks in this behavior with eating habits, physical activity, smoking, and  
24 alcohol consumption among teachers of the state school system.

## 25 26 27 28 29 30 31 32 33 34 35 36 37 38 39 40 41 42 43 44 45 46 47 48 49 50 51 **METHODS**

52  
53  
54 This is an observational cross-sectional study and all procedures were performed  
55 according to the Ethics and Research Committee of University (process number  
56 72191717.9.0000.5402). All volunteers were duly informed about the procedures and  
57  
58  
59  
60

1  
2  
3 objectives of the study and those who agreed to participate signed the Informed Consent  
4  
5 Term.  
6  
7  
8  
9

### 10 **Sample Selection and Inclusion Criteria**

11  
12

13 Presidente Prudente is a Brazilian city located in the west region of Sao Paulo  
14 State, with a population of 207,625 inhabitants and a Human Development Index (HDI)  
15 of 0.846 (Official website of the municipality of Presidente Prudente, 2017)<sup>16</sup>.  
16 According to the City Department of Education, the number of teachers in the city is  
17 approximately 650, allocated in 23 schools. All schools were visited and all teachers in  
18 each school were invited to participate in the survey, thus encompassing the different  
19 regions of the city (north, south, east, west, and central).  
20  
21  
22  
23  
24  
25  
26  
27  
28

29 The data collection did not interfere in the pedagogical activities of the visited  
30 schools, and was performed during the class of collective pedagogical work, at which  
31 time all teachers of the institution were present. All teachers were invited to participate  
32 at least three times by the coordinator of the school. The coordinator, randomly  
33 (lottery), chose the participating teachers. The following inclusion criteria were adopted:  
34 i) be effective teachers (statutory) or hired in the state education network, even if as a  
35 coordinator or deputy director; ii) be present in the class of collective pedagogical work  
36 marked in advance for the accomplishment of the study.  
37  
38  
39  
40  
41  
42  
43  
44  
45  
46  
47  
48  
49

### 50 **Sample Calculation**

51  
52  
53

54 The sample calculation considered a prevalence of outcome of 50%, adopted in  
55 epidemiological studies (Agranonik & Hirakata, 2011)<sup>17</sup>, a population of teachers of the  
56 state education system of 650 teachers, a 95% confidence interval, test power of 80%,  
57  
58  
59  
60



1  
2  
3 and tolerable error of 5%, which provided a simple random sample of 242 teachers.  
4  
5 Even though all 23 schools in the city were invited, only 13 gave permission for the  
6  
7 collection of data.  
8  
9

## 10 11 12 **Organization of Data Collection** 13 14

15  
16 The application of the questionnaire was carried out in the school environment  
17  
18 by previously trained researchers, so that any doubts were promptly resolved.  
19  
20 Evaluations of the anthropometric measurements (weight, height, and waist  
21  
22 circumference) were performed in rooms provided by the management of the schools  
23  
24 participating in the study. In order to avoid possible constraints, male teachers were  
25  
26 evaluated by a male researcher and female teachers by a female researcher.  
27  
28  
29  
30

## 31 32 **Sedentary Behavior** 33 34

35  
36 The subjective model used to measure this variable was based on the  
37  
38 questionnaires provided by The Sedentary Behavior Research Network (SBRN, 2016)<sup>18</sup>,  
39  
40 and the sedentary behaviors evaluated were represented by the number of daily hours in  
41  
42 the week teachers spent on each behavior: watching television, using the computer or  
43  
44 cell phone/tablet, and time sitting or lying down during awake time, both on the desktop  
45  
46 and off. The responses were categorized into: i) less than 1 hour (0 hour computed); ii)  
47  
48 more than 1 hour but less than 2 hours (1 hour computed); iii) more than 2 hours but  
49  
50 less than 3 hours (2 hours computed); iv) more than 3 hours but less than 4 hours (3  
51  
52 hours computed); v) more than 4 hours but less than 5 hours (4 hours computed); vi)  
53  
54 more than 5 hours (5 hours computed). Subjects classified as presenting high sedentary  
55  
56 behavior were those who reported the sum of television, cell/tablet, computer, and  
57  
58  
59  
60

1  
2  
3 sitting time equal to or greater than 8 hours per day, in accordance with the criteria of  
4  
5 Van der Ploeg et al. (2012)<sup>19</sup>.  
6

7  
8 Breaks in sedentary behavior at work and in leisure time were assessed through  
9  
10 self-report, using the following questions:  
11

12 - In your work environment, do you usually get up to go to the bathroom, drink water,  
13  
14 or perform other activities that require you to stand or walk for at least a short time?  
15

16  
17 - In your leisure time, do you usually get up to go to the bathroom, drink water, or  
18  
19 perform other activities that require you to stand or walk for at least a short time?  
20

21 The answers to these questions were presented on a Likert scale, with the options: i)  
22  
23 never; ii) rarely; iii) sometimes; iv) often; and v) always.  
24  
25

## 26 27 28 **Anthropometry** 29

30  
31  
32 All participants were assessed barefoot and wearing light clothing. Body mass,  
33  
34 height, and waist circumference were evaluated. Body mass was measured using a  
35  
36 digital scale (Plenna® brand, Sao Paulo, Brazil) with an accuracy of 0.1 kg. Stature was  
37  
38 evaluated by a portable stadiometer (Sanny® brand, American Medical of Brazil, Sao  
39  
40 Paulo, Brazil) with a maximum extension of 2.20 meters and precision of 0.1cm.  
41  
42  
43  
44  
45

## 46 47 48 **Eating Habits, Consumption of Alcohol and Tobacco** 49

50  
51 Eating habits were self-reported regarding the weekly frequency in the number  
52  
53 of days of consumption for fruits, vegetables, dairy products, fried foods, sweets, grains,  
54  
55 white meat or fish, soft drinks, snacks, and cereals. Participants who reported a weekly  
56  
57 frequency of  $\geq 5$  times a week were classified as high consumption and those who  
58  
59 reported a weekly frequency  $< 5$  times a week as low consumption.  
60

1  
2  
3 The consumption of alcohol and tobacco was self-reported with respect to the  
4 number of days in the previous month, in doses and number of cigarettes, respectively.  
5  
6 Teachers who reported consuming alcoholic drinks on 1-2 or more days and 1-2 doses  
7 per day were considered as presenting high consumption of alcohol and those who  
8 reported smoking any cigarettes in the previous 30 days were considered as smokers.  
9  
10  
11  
12  
13  
14  
15  
16

### 17 **Practice of Physical Activity**

18  
19  
20 The practice of physical activity was evaluated through a questionnaire by  
21 Baecke et al. (1982)<sup>20</sup>. This instrument evaluates the habitual practice of physical  
22 activities through three different domains (physical activity at work, physical activity in  
23 leisure and sports practice, and physical activity outside work), presenting a  
24 dimensionless score and the sum of these three scores represents the total physical  
25 activity practice. The cutoff point for classifying the individuals was arbitrarily defined  
26 by quartiles: “sufficiently active” included those individuals who were in the highest  
27 quartile for the Baecke score (4th quartile), “moderately active” those located in  
28 intermediate quartiles (3rd and 2nd quartiles), and “insufficiently active” those subjects  
29 located in the first quartile.  
30  
31  
32  
33  
34  
35  
36  
37  
38  
39  
40  
41  
42  
43  
44  
45

### 46 **Socioeconomic Status**

47  
48  
49 The Brazilian Economic Classification Criteria (Instituto Brasileiro de Opinião  
50 Pública e Estatística, 2009)<sup>21</sup> was used to assess socioeconomic status. This  
51 questionnaire takes into account the degree of education of the household head, the  
52 presence and quantity of certain rooms and goods in the home (television, DVD, radio,  
53  
54  
55  
56  
57  
58  
59  
60

1  
2  
3 bathroom, car, washing machine, freezer), and classifies respondents into classes A1,  
4  
5 A2, B1, B2, C1, C2, D, and E.  
6  
7

### 8 9 **Statistical analysis**

10  
11  
12 The characterization variables of the sample are expressed as mean and standard  
13  
14 deviation. The association of high sedentary behavior and breaks in sedentary time with  
15  
16 independent variables (eating habits, smoking, alcohol consumption, and physical  
17  
18 activity) were evaluated by the chi-square test. Variables with associations of  $p \leq 0.200$   
19  
20 were considered in the multiple model, performed by Binary Logistic Regression, in  
21  
22 crude analysis and adjusted by sex, age, and socioeconomic condition. Statistical  
23  
24 significance was fixed at 5% and the 95% confidence interval was adopted, with  
25  
26 analyzes in the software SPSS v.15.0.  
27  
28  
29  
30  
31  
32

### 33 **Patient and Public Involvement**

34  
35  
36 Patients and or public were not involved in the research.  
37  
38  
39  
40

## 41 **RESULTS**

42  
43  
44 The sample consisted of 245 individuals (~38% of the teachers), with 186  
45  
46 females (76%), 59 males (24%), and a mean age of  $45.20 \pm 10.42$  years. Table 1 presents  
47  
48 information regarding sample characterization. Teachers with a longer time in sedentary  
49  
50 behavior presented significantly higher fried food consumption ( $P = 0.007$ ), higher  
51  
52 weekly consumption of salty snacks ( $P = 0.035$ ), and higher alcohol consumption ( $P =$   
53  
54  $0.011$ ).  
55  
56  
57  
58  
59  
60

**Table 1.** Characterization of the sample

| Variables                         | Low SB        | High SB       | P     |
|-----------------------------------|---------------|---------------|-------|
|                                   | Mean (SD)     | Mean (SD)     |       |
| Age (years)                       | 47.27 (9.93)  | 43.53 (10.53) | 0.006 |
| Weight (kg)                       | 72.09 (15.97) | 75.91 (17.41) | 0.078 |
| Height (cm)                       | 163.25 (7.95) | 165.23 (8.89) | 0.070 |
| Fruits (days/week)                | 4.89 (2.20)   | 4.36 (2.28)   | 0.068 |
| Vegetables (days/week)            | 5.45 (1.87)   | 5.12 (2.00)   | 0.192 |
| Dairy Products(days/week)         | 4.94 (2.37)   | 4.78 (2.43)   | 0.610 |
| Fried Foods (days/week)           | 1.35 (1.22)   | 1.89 (1.76)   | 0.007 |
| Sweets (days/week)                | 2.97 (1.99)   | 3.28 (2.31)   | 0.281 |
| Grains (days/week)                | 5.95 (1.80)   | 5.85 (1.73)   | 0.650 |
| Cereals (days/week)               | 2.44 (2.29)   | 2.25 (2.11)   | 0.491 |
| White Meat (days/week)            | 4.01 (1.99)   | 3.59 (1.76)   | 0.085 |
| Soft Drinks (days/week)           | 1.29 (1.68)   | 1.42 (1.61)   | 0.531 |
| Snacks (days/week)                | 0.36 (0.85)   | 0.64 (1.15)   | 0.035 |
| Alcoholic Beverages (doses)       | 0.96 (1.89)   | 2.24 (4.73)   | 0.011 |
| Smoking (cigarettes/day)          | 2.92 (1.57)   | 1.43 (0.83)   | 0.370 |
| Physical Activity (Baecke' score) | 7.61 (1.91)   | 7.68 (1.64)   | 0.404 |

SB= Sedentary Behavior; SD= Standard Deviation.

Table 2 presents information regarding high sedentary behavior and variables of eating habits and lifestyle. It was observed that teachers with high sedentary behavior demonstrated a low prevalence of white meat consumption (40.5%) and a high prevalence of alcohol consumption (64.2%), both of which were statistically significant. Marginal associations were observed with low fruit consumption ( $P = 0.071$ ) and high fried food consumption ( $P = 0.056$ ).

**Table2.** Association between high sedentary behavior and independent variables in teachers.

| Variables             | Total<br>(n=245)<br>n | High Sedentary Behavior<br>(n=135)<br>n(%) | p     |
|-----------------------|-----------------------|--------------------------------------------|-------|
| <b>Fruits</b>         |                       |                                            |       |
| Low consumption       | 108                   | 67 (62.0)                                  | 0.071 |
| High consumption      | 135                   | 67 (49.6)                                  |       |
| <b>Vegetables</b>     |                       |                                            |       |
| Low consumption       | 77                    | 44 (57.1)                                  | 0.743 |
| High consumption      | 165                   | 89 (53.9)                                  |       |
| <b>Dairy Products</b> |                       |                                            |       |
| Low consumption       | 93                    | 53 (57.0)                                  | 0.790 |

|    |                            |     |            |       |
|----|----------------------------|-----|------------|-------|
| 1  |                            |     |            |       |
| 2  |                            |     |            |       |
| 3  | High consumption           | 149 | 81 (54.4)  |       |
| 4  | <b>Fried Foods</b>         |     |            |       |
| 5  | Low consumption            | 221 | 118 (53.4) | 0.056 |
| 6  | High consumption           | 19  | 15 (78.9)  |       |
| 7  | <b>Sweets</b>              |     |            |       |
| 8  | Low consumption            | 167 | 86 (51.5)  | 0.120 |
| 9  | High consumption           | 76  | 48 (63.2)  |       |
| 10 | <b>Grains</b>              |     |            |       |
| 11 | Low consumption            | 41  | 24 (58.5)  | 0.763 |
| 12 | High consumption           | 200 | 109 (54.5) |       |
| 13 | <b>Cereals</b>             |     |            |       |
| 14 | Low consumption            | 198 | 113 (57.1) | 0.574 |
| 15 | High consumption           | 43  | 20 (46.5)  |       |
| 16 | <b>White Meat</b>          |     |            |       |
| 17 | Low consumption            | 167 | 102 (61.1) | 0.005 |
| 18 | High consumption           | 74  | 30 (40.5)  |       |
| 19 | <b>Soft Drinks</b>         |     |            |       |
| 20 | Low consumption            | 225 | 125 (55.6) | 0.743 |
| 21 | High consumption           | 16  | 8 (50.0)   |       |
| 22 | <b>Snacks</b>              |     |            |       |
| 23 | Low consumption            | 235 | 130 (55.3) | 0.691 |
| 24 | High consumption           | 3   | 2 (66.7)   |       |
| 25 | <b>Alcoholic Beverages</b> |     |            |       |
| 26 | Low consumption            | 136 | 65 (47.8)  | 0.015 |
| 27 | High consumption           | 109 | 70 (64.2)  |       |
| 28 | <b>Smoking</b>             |     |            |       |
| 29 | Non-Smoker                 | 229 | 127 (55.5) | 0.841 |
| 30 | Smoker                     | 17  | 9 (52.9)   |       |
| 31 | <b>Physical Activity</b>   |     |            |       |
| 32 | Insufficiently active      | 53  | 25 (47.2)  |       |
| 33 | Moderately active          | 128 | 77 (60.2)  | 0.661 |
| 34 | Sufficiently               | 65  | 34 (52.3)  |       |

Table 3 presents information on the magnitude of the associations between sedentary behavior and variables with a value of  $P \leq 0.200$  in the chi-square analysis. There was no relation between high sedentary behavior and fruit consumption; however, teachers with high sedentary behavior were 3 times more likely to present high fried food consumption in the unadjusted model, while in the adjusted analysis, this relationship became marginal ( $p = 0.167$ ). In relation to white meat consumption, teachers with high sedentary behavior were 56% less likely to eat white meat and 96% more likely to present high alcohol consumption, this relationship becoming marginal after adjustments.

**Table 3.** Association between high sedentary behavior and independent variables in teachers.

| Variables                  | Not Adjusted |            |       | Adjusted |           |       |
|----------------------------|--------------|------------|-------|----------|-----------|-------|
|                            | OR           | 95%CI      | p     | OR       | 95%CI     | p     |
| <b>Fruits</b>              |              |            |       |          |           |       |
| Low consumption            | 1.00         | 1.00       |       | 1.00     | 1.00      |       |
| High consumption           | 0.60         | 0.36-1.00  | 0.051 | 0.73     | 0.42-1.26 | 0.267 |
| <b>Fried Foods</b>         |              |            |       |          |           |       |
| Low consumption            | 1.00         | 1.00       |       | 1.00     | 1.00      |       |
| High consumption           | 3.27         | 1.05-10.17 | 0.040 | 2.30     | 0.71-7.46 | 0.167 |
| <b>Sweets</b>              |              |            |       |          |           |       |
| Low consumption            | 1.00         | 1.00       |       | 1.00     | 1.00      |       |
| High consumption           | 1.61         | 0.92-2.81  | 0.091 | 1.50     | 0.84-2.67 | 0.168 |
| <b>White Meat</b>          |              |            |       |          |           |       |
| Low consumption            | 1.00         | 1.00       |       | 1.00     | 1.00      |       |
| High consumption           | 0.43         | 0.24-0.76  | 0.003 | 0.44     | 0.24-0.79 | 0.006 |
| <b>Alcoholic Beverages</b> |              |            |       |          |           |       |
| Low consumption            | 1.00         | 1.00       |       | 1.00     | 1.00      |       |
| High consumption           | 1.96         | 1.17-3.28  | 0.011 | 1.66     | 0.97-2.85 | 0.065 |

Adjusted for sex, age, and socioeconomic status. OR=Odds Ratio; 95%CI= 95% Confidence Interval.

Table 4 shows the associations between the breakdown of sedentary behavior at work and variables of eating habits and lifestyle. It should be noted that teachers with the greatest breaks in sedentary behavior at work were 2.5 times more likely to demonstrate high cereal consumption. Teachers with the greatest breaks in sedentary behavior in this domain were also 2.6 times more likely to be moderately physically active and physically active.

**Table 4.** Association between breaks in sedentary behavior at work and independent variables.

|                       | Not Adjusted |           |       | Adjusted |           |       |
|-----------------------|--------------|-----------|-------|----------|-----------|-------|
|                       | OR           | 95%CI     | p     | OR       | 95%CI     | p     |
| <b>Fruits</b>         |              |           |       |          |           |       |
| Low consumption       | 1.00         | 1.00      |       | 1.00     | 1.00      |       |
| High consumption      | 1.32         | 0.76-2.27 | 0.313 | 1.62     | 0.90-2.92 | 0.108 |
| <b>Vegetables</b>     |              |           |       |          |           |       |
| Low consumption       | 1.00         | 1.00      |       | 1.00     | 1.00      |       |
| High consumption      | 1.34         | 0.75-2.37 | 0.315 | 1.63     | 0.89-3.01 | 0.116 |
| <b>Dairy Products</b> |              |           |       |          |           |       |
| Low consumption       | 1.00         | 1.00      |       | 1.00     | 1.00      |       |
| High consumption      | 1.56         | 0.90-2.71 | 0.112 | 1.93     | 10.7-3.51 | 0.029 |
| <b>Fried Foods</b>    |              |           |       |          |           |       |
| Low consumption       | 1.00         | 1.00      |       | 1.00     | 1.00      |       |
| High consumption      | 1.36         | 0.47-3.92 | 0.567 | 0.89     | 0.29-2.73 | 0.838 |
| <b>Sweets</b>         |              |           |       |          |           |       |
| Low consumption       | 1.00         | 1.00      |       | 1.00     | 1.00      |       |
| High consumption      | 1.18         | 0.65-2.14 | 0.578 | 1.10     | 0.60-2.05 | 0.743 |
| <b>Grains</b>         |              |           |       |          |           |       |

|    |                            |      |           |       |      |           |       |
|----|----------------------------|------|-----------|-------|------|-----------|-------|
| 1  |                            |      |           |       |      |           |       |
| 2  |                            |      |           |       |      |           |       |
| 3  | Low consumption            | 1.00 | 1.00      |       | 1.00 | 1.00      |       |
| 4  | High consumption           | 1.85 | 0.93-3.69 | 0.078 | 1.77 | 0.87-3.58 | 0.115 |
| 5  | <b>Soft Drinks</b>         |      |           |       |      |           |       |
| 6  | Low consumption            | 1.00 | 1.00      |       | 1.00 | 1.00      |       |
| 7  | High consumption           | 1.04 | 0.34-3.11 | 0.941 | 0.67 | 0.21-2.19 | 0.518 |
| 8  | <b>Cereals</b>             |      |           |       |      |           |       |
| 9  | Low consumption            | 1.00 | 1.00      |       | 1.00 | 1.00      |       |
| 10 | High consumption           | 1.94 | 0.89-4.29 | 0.099 | 2.49 | 1.05-5.92 | 0.038 |
| 11 | <b>White Meat</b>          |      |           |       |      |           |       |
| 12 | Low consumption            | 1.00 | 1.00      |       | 1.00 | 1.00      |       |
| 13 | High consumption           | 0.68 | 0.38-1.22 | 0.203 | 0.61 | 0.33-1.13 | 0.120 |
| 14 | <b>Alcoholic Beverages</b> |      |           |       |      |           |       |
| 15 | Low consumption            | 1.00 | 1.00      |       | 1.00 | 1.00      |       |
| 16 | High consumption           | 1.12 | 0.65-1.93 | 0.674 | 0.97 | 0.55-1.72 | 0.929 |
| 17 | <b>Smoking</b>             |      |           |       |      |           |       |
| 18 | Low consumption            | 1.00 | 1.00      |       | 1.00 | 1.00      |       |
| 19 | High consumption           | 1.15 | 0.39-3.39 | 0.796 | 1.00 | 0.32-3.08 | 0.995 |
| 20 | <b>Physical Activity</b>   |      |           |       |      |           |       |
| 21 | Insufficiently active      | 1.00 | 1.00      |       | 1.00 | 1.00      |       |
| 22 | Moderately active          | 2.65 | 1.35-5.18 | 0.004 | 2.60 | 1.28-5.28 | 0.008 |
| 23 | Active                     | 2.61 | 1.21-5.63 | 0.014 | 2.57 | 1.14-5.77 | 0.022 |

Adjusted for sex, age, and socioeconomic level. OR=Odds Ratio; 95%CI= 95% Confidence Interval.

When considering sedentary behavior in leisure, high breaks in this type of behavior were associated with greater chances of high consumption of fruits and vegetables, in which the teachers with high breaks were two times more likely to consume these foods. Another important indicator is that teachers with high breaks in sedentary leisure behavior were more likely to be physically active ( $P = 0.043$ ). This information is presented in Table 5.

**Table 5.** Association between breaks in sedentary behavior at leisure time and independent variables.

|                       | Not Adjusted |           |       | Adjusted |           |       |
|-----------------------|--------------|-----------|-------|----------|-----------|-------|
|                       | OR           | 95%CI     | p     | OR       | 95%CI     | p     |
| <b>Fruits</b>         |              |           |       |          |           |       |
| Low consumption       | 1.00         | 1.00      |       | 1.00     | 1.00      |       |
| High consumption      | 2.31         | 1.32-4.05 | 0.003 | 2.33     | 1.28-4.23 | 0.005 |
| <b>Vegetables</b>     |              |           |       |          |           |       |
| Low consumption       | 1.00         | 1.00      |       | 1.00     | 1.00      |       |
| High consumption      | 1.81         | 1.02-3.21 | 0.043 | 1.91     | 1.05-3.49 | 0.035 |
| <b>Dairy Products</b> |              |           |       |          |           |       |
| Low consumption       | 1.00         | 1.00      |       | 1.00     | 1.00      |       |
| High consumption      | 1.38         | 0.79-2.41 | 0.257 | 1.36     | 0.76-2.44 | 0.298 |
| <b>Fried Foods</b>    |              |           |       |          |           |       |
| Low consumption       | 1.00         | 1.00      |       | 1.00     | 1.00      |       |
| High consumption      | 0.92         | 0.33-2.53 | 0.876 | 0.94     | 0.32-2.73 | 0.947 |
| <b>Sweets</b>         |              |           |       |          |           |       |
| Low consumption       | 1.00         | 1.00      |       | 1.00     | 1.00      |       |
| High consumption      | 1.18         | 0.65-2.15 | 0.581 | 1.21     | 0.65-2.24 | 0.541 |



1  
2  
3  
4  
5  
6  
7  
8  
9  
10  
11  
12  
13  
14  
15  
16  
17  
18  
19  
20  
21  
22  
23  
24  
25  
26  
27  
28  
29  
30  
31  
32  
33  
34  
35  
36  
37  
38  
39  
40  
41  
42  
43  
44  
45  
46  
47  
48  
49  
50  
51  
52  
53  
54  
55  
56  
57  
58  
59  
60**Grains**

|                  |      |           |       |      |           |       |
|------------------|------|-----------|-------|------|-----------|-------|
| Low consumption  | 1.00 | 1.00      |       | 1.00 | 1.00      |       |
| High consumption | 1.11 | 0.53-2.29 | 0.779 | 1.11 | 0.53-2.33 | 0.773 |

**Soft Drinks**

|                  |      |           |       |      |           |       |
|------------------|------|-----------|-------|------|-----------|-------|
| Low consumption  | 1.00 | 1.00      |       | 1.00 | 1.00      |       |
| High consumption | 0.53 | 0.19-1.49 | 0.231 | 0.48 | 0.16-1.44 | 0.193 |

**Cereals**

|                  |      |           |       |      |           |       |
|------------------|------|-----------|-------|------|-----------|-------|
| Low consumption  | 1.00 | 1.00      |       | 1.00 | 1.00      |       |
| High consumption | 1.80 | 0.81-3.98 | 0.145 | 2.04 | 0.87-4.80 | 0.100 |

**White Meat**

|                  |      |           |       |      |           |       |
|------------------|------|-----------|-------|------|-----------|-------|
| Low consumption  | 1.00 | 1.00      |       | 1.00 | 1.00      |       |
| High consumption | 1.14 | 0.62-2.08 | 0.667 | 1.14 | 0.61-2.12 | 0.678 |

**Alcoholic Beverages**

|                  |      |           |       |      |           |       |
|------------------|------|-----------|-------|------|-----------|-------|
| Low consumption  | 1.00 | 1.00      |       | 1.00 | 1.00      |       |
| High consumption | 0.91 | 0.53-1.59 | 0.763 | 0.95 | 0.53-1.68 | 0.951 |

**Smoking**

|                  |      |           |       |      |           |       |
|------------------|------|-----------|-------|------|-----------|-------|
| Low consumption  | 1.00 | 1.00      |       | 1.00 | 1.00      |       |
| High consumption | 0.77 | 0.27-2.17 | 0.628 | 0.84 | 0.30-2.41 | 0.751 |

**Physical Activity**

|                       |      |           |       |      |           |       |
|-----------------------|------|-----------|-------|------|-----------|-------|
| Insufficiently active | 1.00 | 1.00      |       | 1.00 | 1.00      |       |
| Moderately active     | 1.68 | 0.86-3.30 | 0.129 | 1.75 | 0.87-3.55 | 0.116 |
| Active                | 2.07 | 0.94-4.57 | 0.070 | 2.34 | 1.03-5.35 | 0.043 |

Adjusted for sex, age, and socioeconomic level. OR=Odds Ratio; 95%CI= 95% Confidence Interval.

**DISCUSSION**

The present study observed a relationship between high sedentary behavior and unhealthy eating habits, highlighting the lower possibility of consumption of white meat and non-consumption of fruits, besides an increase in the chances of consuming alcoholic beverages in teachers. Regarding breaks in sedentary behavior at work and in leisure time, an association was observed with healthier eating habits and greater chances of being physically active.

The predominance of females in the sample appears to be a trend in the area of basic education. This is a reflection of the introduction, in the second half of the twentieth century, of women into the work environment, especially in the functions of teachers and nurses, considered as care functions and an extension of domestic activities (Cardoso et al., 2009)<sup>11</sup>. It should be added that, according to UNESCO (2004)<sup>22</sup>, 81.3% of Brazilian teachers are female.

1  
2  
3 Spending more time watching television was related to less frequent  
4 consumption of fruits and vegetables, and more frequent consumption of sugary drinks  
5 and fast food (Compernelle et al., 2016)<sup>2</sup>. Three lifestyle factors are listed as stimulators  
6 of spontaneous food intake, namely, watching television, sleep deprivation, and alcohol  
7 consumption; emphasizing that alcohol and television increase short-term food intake,  
8 increasing the peak of reward and decreasing inhibitory control (Chapman et al.,  
9 2012)<sup>23</sup>.

10  
11  
12 Regarding the association of the habit of watching television with worse  
13 alimentary consumption, it was observed that individuals who reported this habit  
14 presented greater consumption of soft drinks and meats with excess fat, and lower  
15 consumption of fruits and vegetables. Television is a distracting activity that causes  
16 subjects to ignore sensations such as satiety; thus, greater concentration by the viewer  
17 generates a greater propensity for food consumption. Finally, food advertising directs  
18 the choices to products of high energy density and low nutritional content (Maia et al.,  
19 2016)<sup>24</sup>. In the same sense, a systematic review on the influence of television on food  
20 consumption and obesity among adolescents found a significant association between the  
21 habit of watching television during meals and the consumption of red meats, fast foods,  
22 snacks, and soft drinks, as well as a significant association and inverse relationship  
23 between watching TV during meals and consumption of fruits and vegetables (Rossi et  
24 al., 2010)<sup>25</sup>.

25  
26  
27 The majority of females in the study sample revealed a possibly common  
28 scenario for other studies involving teachers; the presence of double tasks (school and  
29 domestic). This factor may be responsible for the decrease in women's health, leading to  
30 insufficient time for leisure, rest, and hours of sleep, which would imply high levels of  
31 stress, less time to perform physical activities, and a greater probability of alcohol  
32  
33  
34  
35  
36  
37  
38  
39  
40  
41  
42  
43  
44  
45  
46  
47  
48  
49  
50  
51  
52  
53  
54  
55  
56  
57  
58  
59  
60

1  
2  
3 consumption (Vedovato & Monteiro, 2014)<sup>10</sup>. Therefore, the peculiarities of the  
4  
5 teaching career, coupled with the double tasks of women, may suggest reasons for the  
6  
7 high consumption of alcoholic beverages, since sedentary behavior is associated with  
8  
9 unhealthy eating habits, such as alcohol consumption (Pearson & Biddle, 2011)<sup>26</sup>. The  
10  
11 practice of physical activity combined with healthy eating habits could be guiding  
12  
13 elements for achieving weight loss, improving physical capacity, and preventing  
14  
15 diseases (De Araújo & De Araújo, 2000)<sup>27</sup>. It is known that light intensity physical  
16  
17 activity increases the metabolic rate, and the energy cost of such activities throughout  
18  
19 the day can contribute significantly to the total daily energy expenditure (Pate, O'Neil &  
20  
21 Lobelo, 2008)<sup>28</sup>.

22  
23  
24  
25  
26 In this sense, greater interruptions in sedentary time were associated in a  
27  
28 beneficial way with variables of metabolic risk, such as adiposity and triglyceride  
29  
30 measurements. Therefore, recommendations to regularly "break" sedentary time, either  
31  
32 in the workplace or during television advertising are important (Healy et al., 2008)<sup>29</sup>.

33  
34  
35 We observed that teachers, who, even when engaged in a non-sedentary work  
36  
37 activity, promoted greater interruptions in the short time they were sedentary at work or  
38  
39 in leisure, demonstrated better eating habits (consumption of cereals, fruits, and  
40  
41 vegetables) and better physical activity. In a study with teachers about the practice of  
42  
43 physical activity in free time, the hypothesis was raised that the association with the  
44  
45 practice of insufficient physical activity in free time may have occurred in the opposite  
46  
47 direction, that is, teachers who practice physical activity may present greater physical  
48  
49 fitness to withstand physiological workloads, and thus, feel the standing time in the  
50  
51 performance of teaching activities less intensely (Dias et al., 2017)<sup>12</sup>. This may be the  
52  
53 explanation for our findings, since teachers who are physically active tend to break  
54  
55 sedentary behavior more frequently, whether at work or in leisure.  
56  
57  
58  
59  
60

1  
2  
3 The present study is limited by its cross-sectional design, which prevents the  
4 analysis of cause and effect. The self-report assessment of variables is another factor to  
5 be considered and may be vulnerable to biases. However, advancements in this study  
6 were the assessment in a specific and important professional class who perform light  
7 intensity physical activities during almost all their work time, rather than in sedentary  
8 behavior, where most studies concentrate their efforts and investigation how sedentary  
9 behavior and lifestyle habits are associated. It should also be noted that the data  
10 collection was performed in the workplace, not sent electronically. This allows for  
11 greater veracity in the collected data, especially in the anthropometric measurements,  
12 and not in a self-reported way.  
13  
14  
15  
16  
17  
18  
19  
20  
21  
22  
23  
24  
25

26 In summary, we observed an association of high sedentary behavior with  
27 unhealthy eating habits, such as reduced white meat intake and high consumption of  
28 alcoholic beverages. However, a higher frequency of discontinuation of sedentary  
29 behavior was associated with healthy eating habits (greater chances of eating cereals,  
30 fruits, and vegetables) and better rates of physical activity. Actions to raise awareness  
31 about the health of teachers are essential, since knowledge obtained, when not  
32 transmitted to the major stakeholders, becomes innocuous and does not produce  
33 changes in behavior in society. The main functions of this type of study are to provide  
34 indicatives about health profiles and possible linked risk factors. It should be  
35 emphasized that the findings of this research can contribute to strategies of health  
36 promotion actions for these teaching professionals.  
37  
38  
39  
40  
41  
42  
43  
44  
45  
46  
47  
48  
49  
50  
51  
52  
53  
54  
55  
56  
57  
58  
59  
60

## DECLARATIONS

### Ethics approval and consent to participate

All procedures performed in studies involving human participants were in accordance with the ethical standards of the institutional and/or national research committee and with the 1964 Helsinki declaration and its later amendments or comparable ethical standards. Informed consent was obtained from all individual participants included in this study. The Research Ethics Committee Involving Human Beings of UNESP - São Paulo State University approved this study (Protocol: 72191717.9.0000.5402).

### Consent for publication

Not applicable.

### Availability of data and materials

All data generated or analyzed during this study are included in this published article [and its supplementary information files].

### Competing interests

The authors declare that they have no competing interests.

### Funding

Not applicable.

### Authors' contributions

We declare that all authors named in this paper: Leandro Dragueta Delfino; William Rodrigues Tebar; Fernanda Caroline Staquécini Gil Tebar; Jefferson Marinho de Souza; Marcelo Romanzini; Rômulo Araújo Fernandes and Diego Giulliano Destro

1  
2  
3 Christofaro participated in the present study based on the following criteria about  
4 authorship recommendations:  
5  
6  
7

- 8 - Substantial contributions to the conception or design of the work; or the acquisition,  
9 analysis, or interpretation of data for the work;  
10  
11  
12  
13 - Drafting the work or revising it critically for important intellectual content;  
14  
15  
16 - Final approval of the version to be published;  
17  
18  
19 - Agreement to be accountable for all aspects of the work in ensuring that questions  
20 related to the accuracy or integrity of any part of the work are appropriately investigated  
21 and resolved.  
22  
23  
24

## 25 **Acknowledgements**

26  
27  
28  
29 Not applicable.  
30  
31  
32

## 33 **REFERENCES**

- 34  
35  
36  
37  
38 1. Chastin SFM, Egerton T, Leask C, et al. Meta-Analysis of the relationship between  
39 breaks in sedentary behavior and cardiometabolic health. *Obesity* 2015;23:1800-  
40 10.  
41  
42 2. Compernelle S, De Cocker K, Teixeira PJ, et al. The associations between domain-  
43 specific sedentary behaviours and dietary habits in European adults: a cross-  
44 sectional analysis of the SPOTLIGHT survey. *BMC Public Health* 2016;16:1057-  
45 66.  
46  
47 3. World Health Organization. *Physical inactivity: a global public health problem*.  
48 Geneva: World Health Organization, 2008.  
49  
50 4. Nam JY, Kim J, Cho KH, et al. Associations of sitting time and occupation with  
51 metabolic syndrome in South Korean adults: a cross-sectional study. *BMC Public*  
52 *Health* 2016;16:943-53.  
53  
54 5. Healy GN, Clark BK, Winkler EAH, et al. Measurement of adults' sedentary time  
55 in population-based studies. *Am J Prev Med* 2011; 41:216-27.  
56  
57 6. Thorp AA, Healy GN, Winkler E, et al. Prolonged sedentary time and physical  
58 activity in workplace and non-work contexts: a cross-sectional study of office,  
59 customer service and call centre employees. *Int J Behav Nutr Phys Act* 2012;9:128.  
60

- 1
  - 2
  - 3
  - 4
  - 5
  - 6
  - 7
  - 8
  - 9
  - 10
  - 11
  - 12
  - 13
  - 14
  - 15
  - 16
  - 17
  - 18
  - 19
  - 20
  - 21
  - 22
  - 23
  - 24
  - 25
  - 26
  - 27
  - 28
  - 29
  - 30
  - 31
  - 32
  - 33
  - 34
  - 35
  - 36
  - 37
  - 38
  - 39
  - 40
  - 41
  - 42
  - 43
  - 44
  - 45
  - 46
  - 47
  - 48
  - 49
  - 50
  - 51
  - 52
  - 53
  - 54
  - 55
  - 56
  - 57
  - 58
  - 59
  - 60
7. Ryan CG, Dall PM, Granat MH, et al. Sitting patterns at work: objective measurement of adherence to current recommendations. *Ergonomics* 2011;54:531-8.
8. Hadgraft NT, Lynch BM, Clark BK, et al. Excessive sitting at work and at home: Correlates of occupational sitting and TV viewing time in working adults. *BMC Public Health* 2015;15:899-912.
9. Owen N, Sparling ED, Healy GN, et al. Sedentary Behavior: emerging evidence for a new health risk. *Mayo Clin Proc* 2010; 85:1138-41.
10. Vedovato TG, Monteiro I. Health conditions and factors related to the work ability of teachers. *Industrial Health*2014;52:121–28.
11. Cardoso JP, Ribeiro IQB, Araújo TM, et al. Prevalência de dor musculoesquelética em professores. *Rev Bras Epidemiol* 2009;12:604-14.
12. Dias DF, Loch MR, González AD, et al. Atividade física insuficiente no tempo livre e fatores ocupacionais em professores de escolas públicas. *Rev Saude Pub* 2017;51:68.
13. Vaz M, Bharathi AV. How sedentary are people in ‘sedentary’ occupations? The physical activity of teachers in urban South India. *Occupational Medicine* 2004;54:369-72.
14. Farahmand BY, Persson P-G, Michaëlsson K, et al., for the Swedish Hip Fracture Study Group. Physical activity and hip fracture: a population-based case-control study. *Int J Epidemiol* 2000;29:308-14.
15. Saidj M, Menai M, Charreire H, et al. Descriptive study of sedentary behaviours in 35,444 French working adults: cross-sectional findings from the ACTI-Cités study. *BMC Public Health* 2015;15: 379-89.
16. Site oficial da prefeitura municipal de Presidente Prudente. 2017; <http://www.presidenteprudente.sp.gov.br/site/acidade.xhtml> [acesso em 14 de junho de 2017].
17. Agranonik M, Hirakata VN. Cálculo de tamanho de amostra: proporções. *Revista HCPA* 2011;31:382-88.
18. Sedentary Behaviour Research Network (SBRN). 2016; <http://www.sedentarybehaviour.org/sedentary-behaviour-questionnaires/>[acesso em 12 de janeiro de 2016].
19. Van der Ploeg HP, Chey T, Korda RJ, et al. Sitting time and all-cause mortality risk in 222.497 Australian adults. *Arch Intern Med* 2012;172:494-500.
20. Baecke JA, Burema J, Frijters JE. A short questionnaire for the measurement of habitual physical activity in epidemiological studies. *The American Journal of Clinical Nutrition*1982;36:936- 42
21. Instituto Brasileiro de Opinião Pública e Estatística. Levantamento sócio econômico.2009;<http://www.abep.org/novo/CMS/Utils/FileGenerate.ashx?id=46> [acesso em 08 de março de 2016].

- 1  
2  
3 22. Organização das Nações Unidas para a educação, a ciência e a cultura - UNESCO.  
4 O Perfil dos professores brasileiros: o que fazem, o que pensam, o que almejam —  
5 / Pesquisa Nacional UNESCO. São Paulo: Moderna, 2004.  
6  
7 23. Chapman CD, Benedict C, Brooks SJ, et al. Lifestyle determinants of the drive to  
8 eat: a meta-analysis. *Am J Clin Nutr* 2012;96:492-7.  
9  
10 24. Maia EG, Gomes FMD, Alves MH, et al. Hábito de assistir à televisão e sua  
11 relação com a alimentação: resultados do período de 2006 a 2014 em capitais  
12 brasileiras. *Cad. Saúde Pública* 2016;32:1-14.  
13  
14 25. Rossi CE, Albernaz DO, Vasconcelos FAG, et al. Influência da televisão no  
15 consumo alimentar e na obesidade em crianças e adolescentes: uma revisão  
16 sistemática. *Rev Nutr* 2010;23:607-20.  
17  
18 26. Pearson N, Biddle SJH. Sedentary behavior and dietary intake in children,  
19 adolescents, and adults: A systematic review. *Am J Prev Med* 2011;41:178-88.  
20  
21 27. De Araújo DSMS, De Araújo CGS. Aptidão física, saúde e qualidade de vida  
22 relacionada à saúde em adultos. *Rev Bras Med Esporte* 2000;6:194-203.  
23  
24 28. Pate RR, O'Neil JR, Lobelo F. The evolving definition of sedentary. *Exercise and*  
25 *Sport Sciences Reviews* 2008;36:173-8.  
26  
27 29. Healy GN, Dunstan DW, Salmon J, et al. Breaks in sedentary time – beneficial  
28 associations with metabolic risk. *Diabetes Care* 2008;31:661-6.  
29  
30  
31  
32  
33  
34  
35  
36  
37  
38  
39  
40  
41  
42  
43  
44  
45  
46  
47  
48  
49  
50  
51  
52  
53  
54  
55  
56  
57  
58  
59  
60



# BMJ Open

## Association of sedentary behavior patterns with dietary and lifestyle habits among public school teachers: a cross-sectional study

|                                 |                                                                                                                                                                                                                                                                                                                                                                                                                                                                                                                                                                                                                                                                                                                                                                                                                                                                                                                                                                                                              |
|---------------------------------|--------------------------------------------------------------------------------------------------------------------------------------------------------------------------------------------------------------------------------------------------------------------------------------------------------------------------------------------------------------------------------------------------------------------------------------------------------------------------------------------------------------------------------------------------------------------------------------------------------------------------------------------------------------------------------------------------------------------------------------------------------------------------------------------------------------------------------------------------------------------------------------------------------------------------------------------------------------------------------------------------------------|
| Journal:                        | <i>BMJ Open</i>                                                                                                                                                                                                                                                                                                                                                                                                                                                                                                                                                                                                                                                                                                                                                                                                                                                                                                                                                                                              |
| Manuscript ID                   | bmjopen-2019-034322.R1                                                                                                                                                                                                                                                                                                                                                                                                                                                                                                                                                                                                                                                                                                                                                                                                                                                                                                                                                                                       |
| Article Type:                   | Original research                                                                                                                                                                                                                                                                                                                                                                                                                                                                                                                                                                                                                                                                                                                                                                                                                                                                                                                                                                                            |
| Date Submitted by the Author:   | 06-Jan-2020                                                                                                                                                                                                                                                                                                                                                                                                                                                                                                                                                                                                                                                                                                                                                                                                                                                                                                                                                                                                  |
| Complete List of Authors:       | Delfino, Leandro; Universidade Estadual Paulista Julio de Mesquita Filho Faculdade de Ciencias e Tecnologia Campus de Presidente Prudente Tebar, William ; Universidade Estadual Paulista Julio de Mesquita Filho Faculdade de Ciencias e Tecnologia Campus de Presidente Prudente, Physical Education<br>Gil, Fernanda; Universidade Estadual Paulista Julio de Mesquita Filho Faculdade de Ciencias e Tecnologia Campus de Presidente Prudente De Souza, Jefferson; Universidade Estadual Paulista Julio de Mesquita Filho Faculdade de Ciencias e Tecnologia Campus de Presidente Prudente Romanzini, Marcelo; Universidade Estadual de Londrina, Physical Education<br>Fernandes, Romulo; Universidade Estadual Paulista Julio de Mesquita Filho Faculdade de Ciencias e Tecnologia Campus de Presidente Prudente, Physical Education<br>Christofaro, Diego; Universidade Estadual Paulista Julio de Mesquita Filho Faculdade de Ciencias e Tecnologia Campus de Presidente Prudente, Physical Education |
| <b>Primary Subject Heading</b>: | Epidemiology                                                                                                                                                                                                                                                                                                                                                                                                                                                                                                                                                                                                                                                                                                                                                                                                                                                                                                                                                                                                 |
| Secondary Subject Heading:      | Occupational and environmental medicine, Public health, Nutrition and metabolism                                                                                                                                                                                                                                                                                                                                                                                                                                                                                                                                                                                                                                                                                                                                                                                                                                                                                                                             |
| Keywords:                       | Physical Activity, EPIDEMIOLOGY, NUTRITION & DIETETICS, OCCUPATIONAL & INDUSTRIAL MEDICINE, PUBLIC HEALTH                                                                                                                                                                                                                                                                                                                                                                                                                                                                                                                                                                                                                                                                                                                                                                                                                                                                                                    |
|                                 |                                                                                                                                                                                                                                                                                                                                                                                                                                                                                                                                                                                                                                                                                                                                                                                                                                                                                                                                                                                                              |

SCHOLARONE™  
Manuscripts

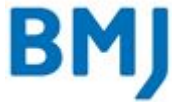

I, the Submitting Author has the right to grant and does grant on behalf of all authors of the Work (as defined in the below author licence), an exclusive licence and/or a non-exclusive licence for contributions from authors who are: i) UK Crown employees; ii) where BMJ has agreed a CC-BY licence shall apply, and/or iii) in accordance with the terms applicable for US Federal Government officers or employees acting as part of their official duties; on a worldwide, perpetual, irrevocable, royalty-free basis to BMJ Publishing Group Ltd ("BMJ") its licensees and where the relevant Journal is co-owned by BMJ to the co-owners of the Journal, to publish the Work in this journal and any other BMJ products and to exploit all rights, as set out in our [licence](#).

The Submitting Author accepts and understands that any supply made under these terms is made by BMJ to the Submitting Author unless you are acting as an employee on behalf of your employer or a postgraduate student of an affiliated institution which is paying any applicable article publishing charge ("APC") for Open Access articles. Where the Submitting Author wishes to make the Work available on an Open Access basis (and intends to pay the relevant APC), the terms of reuse of such Open Access shall be governed by a Creative Commons licence – details of these licences and which [Creative Commons](#) licence will apply to this Work are set out in our licence referred to above.

Other than as permitted in any relevant BMJ Author's Self Archiving Policies, I confirm this Work has not been accepted for publication elsewhere, is not being considered for publication elsewhere and does not duplicate material already published. I confirm all authors consent to publication of this Work and authorise the granting of this licence.

Original Article

**Association of sedentary behavior patterns with dietary and lifestyle habits among public school teachers: a cross-sectional study**

Leandro Dragueta Delfino<sup>1,2\*</sup> (ledragueta@hotmail.com)

William Rodrigues Tebar<sup>1,2</sup> (william.tebar@hotmail.com)

Fernanda Caroline Staquecini Gil Tebar<sup>3</sup> (feernanda\_gil@hotmail.com)

Jefferson Marinho de Souza<sup>3</sup> (jefferson.msouza@hotmail.com)

Marcelo Romanzini<sup>4</sup> (mromanzini@uel.br)

Rômulo Araújo Fernandes<sup>1,2,3</sup> (romulo@fct.unesp.br)

Diego Giulliano Destro Christofaro<sup>1,2,3</sup> (diego@fct.unesp.br)

<sup>1</sup> São Paulo State University (Unesp), School of Technology and Science, Physical Education Department, Presidente Prudente, São Paulo, Brazil.

<sup>2</sup> Post-graduation Program in Movement Sciences, São Paulo State University – Unesp.

<sup>3</sup> Sao Paulo State University (Unesp), Physiotherapy Department, Post-Graduation Program in Physiotherapy, Presidente Prudente, São Paulo, Brazil.

<sup>4</sup> State University of Londrina (UEL), Physical Education Department, Physical Education and Sport Center, Presidente Prudente, São Paulo, Brazil.

\*Corresponding author

E-mail: ledragueta@hotmail.com

Rua Roberto Simonsen, 305 CEP: 19060-900 - P. Prudente, SP +55018981019340.

Word count: 3967.

## ABSTRACT

**Objectives:** To analyze the association of sedentary behavior patterns with dietary and lifestyle habits among public school teachers. **Design:** Cross-sectional study.

**Participants:** A sample of 245 teachers (186 women and 59 men) with mean age of 45.2 ( $\pm 10.4$ ) were randomly selected from public schools. **Primary and secondary**

**outcome measure:** Sedentary behavior was assessed by hours spent watching television, computer and cellphone/tablet use, and in sitting position. Sedentary breaks were reported in a Likert scale in domains of work and leisure time. Dietary habits were assessed by weekly consumption of fruits, vegetables, dairy products, fried foods, sweets, grains, cereals, white meat, soft drinks, and snacks. Physical activity, smoking, alcohol consumption, and socioeconomic status were assessed by using questionnaires.

**Results:** The prevalence of high sedentary behavior, high sedentary breaks at work and at leisure were 57.9%, 67.7%, and 70.2% in the sample, respectively. No relationship was observed of high sedentary behavior with dietary and lifestyle habits in adjusted analysis. However, high sedentary breaks at work were associated to high consumption of dairy products (OR=1.93[CI=1.07-3.51]) and cereals (OR=2.49[CI=1.05-5.92]), and with being high physically active (OR=2.57[CI=1.14-5.77]). High sedentary breaks at leisure time were associated to high consumption of fruits (OR=2.33[CI=1.28-4.23]) and vegetables (OR=1.91[CI=1.05-3.49]), and with be high physically active (OR=2.34[CI=1.03-5.35]). High sedentary breaks were associated to better dietary habits even among teachers with high sedentary behavior. **Conclusion:** High sedentary breaks were associated with better dietary habits and with high levels of physical activity among public school teachers, even those with high sedentary behavior.

**Keywords:** Screen time; Sitting; Sedentary breaks; Food consumption; Physical activity.

## ARTICLE SUMMARY

### Strengths and limitations of this study

#### Limitations:

- Cross-sectional design does not allow cause and effect inference in the present study.
- Subjective assessment of physical activity and sedentary behavior (questionnaire) did not allow a more robust evidence.

#### Strengths:

- A randomly selected sample and analyses controlled by sex, age, and socioeconomic status.
- Physical activity and breaks in sedentary behavior were assessed in domains of occupation and leisure time.
- The association of sedentary breaks in different domains with dietary habits among teachers has not been previously analyzed in literature.

## INTRODUCTION

Sedentary behavior is defined as the time spent in activities of energy expenditure of  $\geq 1.5$  METs in seated, reclined, or lying posture (Compernelle et al., 2016)<sup>1</sup>. Nowadays, people spend much of their awaked time on this type of activities, resulting in an increased sedentary behavior both at work and leisure time (Chastin et al., 2015)<sup>2</sup>.

World Health Organization report highlights that 3.2 million of deaths per year were attributed to sedentary lifestyle (WHO, 2008)<sup>3</sup>. Adult population spends around one-third to one-half of daily time in sedentary behavior, with prolonged hours on screen-devices as watching TV, using computers, participating in screen-based recreation, or driving (Nam et al., 2016)<sup>4</sup>.

The amount of time in sedentary behavior has been widely evaluated in three ways: 1) checking for specific behaviors, such as television time; 2) quantification of sedentary time in a specific domain (work, leisure, or transportation); 3) total time allocated to all manifestations of sedentary behavior throughout the day (Healy et al., 2011)<sup>5</sup>. In this sense, a large proportion of daily sedentary behaviors has been accumulated at work environment, once studies observed office workers spend at least two-thirds of their working hours seated (Thorp et al., 2012; Ryan et al., 2011)<sup>6-7</sup>. Besides, due to technological advances, sitting position has become a normative stance (Hadgraft et al., 2015)<sup>8</sup>.

Sitting time has been related to unhealthy dietary habits in adults (Compernelle et al., 2016)<sup>1</sup>. Besides that, screen devices have been associated to exposure of food advertisements, which may lead to consumption of products of high energy density and low nutritional content (Maia et al., 2016)<sup>9</sup>. In this sense, the assessment of the relationship between sedentary patterns and dietary habits is important for public health,

1  
2  
3 once adults with a healthy dietary pattern showed a more active lifestyle than those with  
4  
5 unhealthy dietary patterns (Hsueh et al., 2019)<sup>10</sup>, and the association of physical activity  
6  
7 and healthy dietary habits contributes to the prevention of diseases (De Araújo & De  
8  
9 Araújo, 2000)<sup>11</sup>.

12 However, how life habits of predominantly non-sedentary workers is affected by  
13  
14 the levels of sedentary behavior is not consensual in literature, mainly among teachers.  
15  
16 In Brazil, there are more than 2.6 million teachers of basic and higher education, which  
17  
18 represents a large professional category (Vedovato & Monteiro, 2014)<sup>12</sup>. Besides that,  
19  
20 teachers' workload is characterized by a considerable physical requirement, once these  
21  
22 professionals remain for 95% of their work activities in orthostatic position (Cardoso et  
23  
24 al., 2009)<sup>13</sup>. In addition, teachers perform a high demand of repetitive activities, most of  
25  
26 them in ergonomically inadequate environments and in a complex nature of the teaching  
27  
28 professional's role (Dias et al., 2017)<sup>14</sup>. Teachers therefore has a non-sedentary physical  
29  
30 activity profile (Vaz & Bharathi, 2004)<sup>15</sup>, and teachers are categorized as moderately  
31  
32 active in their work functions (Farahmand et al., 2000)<sup>16</sup>.

33  
34  
35  
36  
37 Nevertheless, physically active jobs can be associated with increased sitting time  
38  
39 during leisure, and the relationship between occupation type and sedentary behavior  
40  
41 outside work needs further research (Saidj et al., 2015)<sup>17</sup>. Besides that, frequent breaks  
42  
43 in sedentary activities has been considered as an important strategy to mitigate the  
44  
45 health impairments of sedentary behavior, once sedentary breaks with light activities  
46  
47 (i.e. walking down the corridor to talk to co-workers or extending the distance walking  
48  
49 to the restroom), can lead to important health benefits (Owen et al., 2010)<sup>18</sup>.

50  
51  
52  
53 Thus, the present study aimed to analyze in the same research the relation  
54  
55 between sedentary behavior and breaks in sedentary time at work and leisure with  
56  
57  
58  
59  
60

1  
2  
3 dietary and lifestyle habits in public school teachers, controlled by confounding factors  
4  
5 such as sex, age, and socioeconomic status.  
6  
7  
8  
9

## 10 **METHODS**

11  
12

13 An observational study with cross-sectional design was performed according to  
14 the Ethics and Research Committee of University (process number  
15 72191717.9.0000.5402). All participants were duly informed about the objectives and  
16 procedures of the research and those who agreed to participate signed the Informed  
17 Consent Term.  
18  
19  
20  
21  
22  
23  
24  
25  
26

### 27 **Sample Selection and Inclusion Criteria**

28  
29

30 Sample was selected in the city of Presidente Prudente, which is located in the  
31 Southern region of Brazil. There are about 207,625 inhabitants in the city of Presidente  
32 Prudente, which has a Human Development Index (HDI) of 0.846 (Brazilian Institute  
33 of Geography and Statistics, 2017)<sup>19</sup>. According to the City Department of Education,  
34 the number of public school teachers in the city is approximately 650, allocated in 23  
35 schools.  
36  
37  
38  
39  
40  
41  
42  
43

44 Data collection was performed during the period of collective pedagogical work,  
45 at which time all teachers of the institution were present, so that did not interfere in their  
46 pedagogical activities. The teachers were invited to participate for at least three times by  
47 the school manager. To participate of the research, the following inclusion criteria were  
48 adopted: i) be effective teacher (approved in civil service exam) or hired by the state  
49 education network; ii) participate of all procedures (questionnaire, anthropometry) and  
50 sign the Informed Consent Term.  
51  
52  
53  
54  
55  
56  
57  
58  
59  
60



## Sample Calculation

The minimum sample size was calculated for a greater Research Project about Health Behaviors in Teachers, which considered a prevalence of outcome of 50%, adopted in epidemiological studies with unknown prevalence or several outcomes (Agranonik & Hirakata, 2011)<sup>20</sup>, a population of 650 public school teachers in the city, a confidence interval of 95%, a test power of 80%, and tolerable error of 5%, which provided a simple random sample of 242 teachers. From all 23 schools in the city invited to participate, only 13 gave permission to collect the data, all the 13 schools were visited, and all the teachers of these schools were invited to participate.

## Organization of Data Collection

Data collection was performed between the second semester of 2016 and first semester of 2017. The application of questionnaires was carried in the school environment by previously trained researchers, so that any doubts were promptly resolved. Evaluations of the anthropometric measurements (weight, height, and waist circumference) were performed in a specific room provided by the school manager. In order to avoid possible constraints, male teachers were evaluated by a male researcher and female teachers by a female researcher.

## Sedentary Behavior

The assessment of this variable was based on the Sedentary Behavior Questionnaire – SBQ (Rosemberg et al., 2010)<sup>21</sup>, through the self-reported hours in a typical weekday and at weekend that teachers spent in television viewing, using the

1  
2  
3 computer, using cell phone/tablet, as well as in sitting time in a typical weekday. The  
4  
5 responses were categorized into: i) less than 1 hour (0 hour computed); ii) more than 1  
6  
7 hour but less than 2 hours (1 hour computed); iii) more than 2 hours but less than 3  
8  
9 hours (2 hours computed); iv) more than 3 hours but less than 4 hours (3 hours  
10  
11 computed); v) more than 4 hours but less than 5 hours (4 hours computed); vi) more  
12  
13 than 5 hours (5 hours computed).  
14  
15

16  
17 It was calculated the mean of hours from a typical weekday and from a weekend  
18  
19 day reported for each behavior (television, computer, cellphone/tablet) and the  
20  
21 sedentary behavior was calculated by the sum of the mean hours and total daily hours  
22  
23 reported in sitting. The sample was classified as “high sedentary behavior” and “low  
24  
25 sedentary behavior” according to cutoff point of 8 and more hours (Van der Ploeg et al.  
26  
27 2012)<sup>22</sup>.  
28  
29

30  
31 Breaks in sedentary behavior at work and in leisure time were self-reported  
32  
33 according to the following questions:  
34

35  
36 - In your work environment, how frequent do you get up to go to the bathroom, drink  
37  
38 water, or perform other activities that require standing or walking for at least a short  
39  
40 time?  
41

42  
43 - In your leisure time, how frequent do you get up to go to the bathroom, drink water, or  
44  
45 perform other activities that require standing or walking for at least a short time?  
46

47  
48 The answers were presented on a Likert scale: i) never; ii) rarely; iii) sometimes;  
49  
50 iv) often; and v) always. The sample was divided into “high sedentary breaks” (often,  
51  
52 always) and “low sedentary breaks” (never, rarely, sometimes) for each domain.  
53  
54

## 55 56 **Anthropometry** 57 58 59 60

1  
2  
3 Measurements of body mass, height, and waist circumference were collected  
4 with participants being barefoot and wearing light clothing. Body mass was measured  
5 using a digital scale (Plenna® brand, Sao Paulo, Brazil) with an accuracy of 0.1 kg.  
6  
7 Stature was evaluated by a portable stadiometer (Sanny® brand, American Medical of  
8 Brazil, Sao Paulo, Brazil) with a maximum extension of 2.20 meters and precision of  
9 0.1cm. Waist circumference was collected through the middle point between the last rib  
10 and superior border of iliac crest (WHO, 2000)<sup>23</sup> by an inextensible measuring tape with  
11 precision in millimeters and extension of 2 meters.  
12  
13  
14  
15  
16  
17  
18  
19  
20  
21  
22  
23

### 24 **Dietary Habits, Consumption of Alcohol and Smoking**

25  
26  
27 Dietary habits were assessed by a food frequency questionnaire about the weekly  
28 frequency (days/week) consumption of fruits, vegetables, dairy products (i.e. milk,  
29 yogurt, cheese, creamy cheese), fried foods, sweets, grains (i.e. bean, rice, pea, lentil,  
30 chickpea, soy), white meat or fish, soft drinks, snacks, and cereals (i.e. oat, granola,  
31 cornflakes). This instrument was based on questionnaire proposed by the Brazilian  
32 Surveillance System for Risk and Protective Factors for Chronic Diseases by Telephone  
33 Survey (VIGITEL)<sup>24</sup>, which assess the frequency of consumption through the number  
34 of days per week and defines as regular consumption the frequency of  $\geq 5$  days per week  
35 for different types of food. In this sense, the food consumption was classified as high  
36 consumption ( $\geq 5$  days/week) and “low consumption” (4 or less days/week).  
37  
38  
39  
40  
41  
42  
43  
44  
45  
46  
47  
48  
49

50 The consumption of alcohol and smoking was assessed through questions of the  
51 Brazilian Center for Information on Psychotropic Drugs (Galduróz et al., 1999)<sup>25</sup>. The  
52 alcohol consumption questionnaire was composed by the frequency of alcoholic  
53 beverages consumed in the last 30 days and the number of doses per day. Teachers who  
54 report alcohol consumption for at least 1-2 days/week and 1-2 doses per day were  
55  
56  
57  
58  
59  
60

1  
2  
3 classified as “high alcohol consumption”. The smoking habit was assessed by questions  
4  
5 about the number of days smoked in the last 30 days, as well as the number of cigarettes  
6  
7 per day. Teachers who reported smoking any cigarettes in the previous 30 days were  
8  
9 considered as smokers. This type of instrument was previously used in epidemiological  
10  
11 study (Conner et al., 2017)<sup>26</sup>.  
12  
13  
14  
15  
16

### 17 **Practice of Physical Activity**

18  
19  
20 The practice of physical activity was evaluated by using Baecke questionnaire  
21  
22 (Baecke et al., 1982)<sup>27</sup>. This instrument evaluates the habitual practice of physical  
23  
24 activities through three different domains (physical activity at work, physical activity in  
25  
26 leisure and sports practice, and physical activity outside work), presenting a  
27  
28 dimensionless score which ranges from 1 to 5 points for each domain, providing a total  
29  
30 score from 3 to 15 points through the sum of the three assessed domains. The cutoff  
31  
32 point for classifying the individuals was defined by quartiles: “high active” included  
33  
34 those individuals who were in the highest quartile for the Baecke score (4th quartile),  
35  
36 “moderately active” those located in intermediate quartiles (3rd and 2nd quartiles), and  
37  
38 “less active” those subjects located in the first quartile.  
39  
40  
41  
42  
43  
44  
45

### 46 **Socioeconomic Status**

47  
48  
49 Brazilian Economic Classification Criteria (Brazilian Institute of Public Opinion  
50  
51 and Statistics, 2015)<sup>28</sup> was used to assess the socioeconomic status (SES). This  
52  
53 questionnaire takes into account the degree of education, and the presence and quantity  
54  
55 of certain rooms and goods in the home (television, DVD, radio, bathroom, car,  
56  
57 washing machine, freezer). The instrument classifies the sample by scores into classes  
58  
59  
60

1  
2  
3 from the highest to lowest: A1, A2, B1, B2, C1, C2, D, and E. The sample was further  
4  
5 classified as high SES (A1, A2), medium SES (B1, B2, C1), and low SES (C2, D, E).  
6  
7

### 8 9 **Statistical analysis**

10  
11  
12 Data distribution was assessed by Kolmogorov-Smirnov test and, due to non-  
13  
14 normal distribution, the characteristics of sample were expressed as median and  
15  
16 interquartile range. The median differences were verified by the Wilcoxon rank test for  
17  
18 dependent samples and by U Mann-Whitney test for independent samples. The  
19  
20 correlation between breaks in sedentary behavior with sedentary time in different  
21  
22 domains was analyzed by Spearman Correlation Coefficient. The association of high  
23  
24 sedentary behavior and breaks in sedentary time with independent variables (dietary  
25  
26 habits, smoking, alcohol consumption, and physical activity) were evaluated by the chi-  
27  
28 square test. Variables with associations of  $p \leq 0.200$  were considered in the multiple  
29  
30 model, performed by Binary Logistic Regression adjusted by sex, age, and  
31  
32 socioeconomic condition. For a clustering analysis of sedentary behavior and breaks,  
33  
34 the sample was divided into three groups: high sedentary behavior with low sedentary  
35  
36 breaks (group 1), high sedentary behavior with high sedentary breaks (group 2), and low  
37  
38 sedentary behavior (group 3). Statistical significance was fixed at 5% and the 95%  
39  
40 confidence interval was adopted, with analyzes in the software SPSS v.15.0.  
41  
42  
43  
44  
45  
46  
47  
48

### 49 **Patient and Public Involvement**

50  
51  
52 Patients and the public were not involved in the design or planning of the study.  
53  
54  
55  
56

### 57 **RESULTS**

58  
59  
60

The sample consisted of 245 individuals (~38% of the public school teachers from the city), with 186 females (76%), 59 males (24%), and a mean age of 45.2 ( $\pm 10.4$ ) years. The prevalence of high SES was 5.7% in the sample, followed by 91.0% of medium SES, and 3.3% of low SES. A prevalence of 57.9% of the sample was classified as high sedentary behavior. Median values of sedentary behavior in a typical weekday and at weekend was the same in the sample (6.0 hours [Interquartile range= 6.0], p-value for Wilcoxon rank's test= 0.360), however higher values of television viewing and lower values of computer use at weekend than weekday were observed (p-value for Wilcoxon rank test= 0.001 for both). Table 1 presents information regarding sample characterization according to low and high sedentary behavior. Teachers with high sedentary behavior presented lower age (p= 0.017) and higher consumption of snacks (p= 0.003) and alcoholic beverages (0.001) than teachers with low sedentary behavior.

**Table 1.** Characterization of the sample according to sedentary behavior level in public school teachers.

| Variable                             | Low SB             | High SB            | p-value*     |
|--------------------------------------|--------------------|--------------------|--------------|
|                                      | Median (IR)        | Median (IR)        |              |
| Age (years)                          | <b>49.0 (12.0)</b> | <b>45.0 (17.0)</b> | <b>0.017</b> |
| Body mass index (kg/m <sup>2</sup> ) | 26.5 (7.4)         | 27.2 (7.8)         | 0.445        |
| Waist circumference (centimeters)    | 85.0 (20.0)        | 88.0 (21.0)        | 0.334        |
| Fruits (days/week)                   | 5.0 (4.0)          | 5.0 (4.0)          | 0.330        |
| Vegetables (days/week)               | 6.0 (3.0)          | 6.0 (4.0)          | 0.307        |
| Dairy Products(days/week)            | 7.0 (4.0)          | 5.0 (5.0)          | 0.164        |
| Fried Foods (days/week)              | 1.0 (1.0)          | 1.0 (1.0)          | 0.216        |
| Sweets (days/week)                   | 3.0 (4.0)          | 3.0 (4.0)          | 0.794        |
| Grains (days/week)                   | 7.0 (1.0)          | 7.0 (2.0)          | 0.160        |
| Cereals (days/week)                  | 2.0 (4.0)          | 2.0 (3.0)          | 0.500        |
| White Meat (days/week)               | 4.0 (3.0)          | 3.0 (3.0)          | 0.354        |
| Soft Drinks (days/week)              | 1.0 (2.0)          | 1.0 (2.0)          | 0.122        |
| Snacks (days/week)                   | <b>0.0 (0.0)</b>   | <b>0.0 (1.0)</b>   | <b>0.003</b> |
| Alcoholic Beverages (doses/day)      | <b>0.0 (1.0)</b>   | <b>0.0 (3.0)</b>   | <b>0.001</b> |
| Smoking (cigarettes/day)             | 0.0 (0.0)          | 0.0 (0.0)          | 0.595        |

|                                             |           |           |       |
|---------------------------------------------|-----------|-----------|-------|
| Physical Activity (Baecke' score)           | 7.3 (2.4) | 7.4 (2.2) | 0.369 |
| Breaks in SB at Work (frequency)            | 4.0 (2.0) | 4.0 (2.0) | 0.741 |
| Breaks in SB at Leisure time<br>(frequency) | 4.0 (2.0) | 4.0 (1.0) | 0.907 |

SB= Sedentary Behavior; SD= Standard Deviation. \*p-value for Mann-Whitney U test.

Table 2 presents relation between prevalence of high sedentary behavior and high consumption of foods and lifestyle habits. It was observed higher prevalence of high sedentary behavior among teachers with high consumption of alcoholic beverages than those with low alcoholic beverages consumption (67.0% vs. 50.0%).

**Table2.** Relation of high sedentary behavior with dietary and lifestyle habits in public school teachers.

|                      | Total<br>(n=245)<br>n | High Sedentary Behavior<br>(n=142)<br>n(%) | Chi-square<br>value | p-value |
|----------------------|-----------------------|--------------------------------------------|---------------------|---------|
| <b>Fruit</b>         |                       |                                            |                     |         |
| Low consumption      | 108                   | 68 (63.0)                                  | 2.278               | 0.131   |
| High consumption     | 135                   | 72 (53.3)                                  |                     |         |
| <b>Vegetable</b>     |                       |                                            |                     |         |
| Low consumption      | 77                    | 46 (59.7)                                  | 0.245               | 0.621   |
| High consumption     | 165                   | 93 (56.4)                                  |                     |         |
| <b>Dairy Product</b> |                       |                                            |                     |         |
| Low consumption      | 93                    | 58 (62.4)                                  | 1.262               | 0.261   |
| High consumption     | 149                   | 82 (55.0)                                  |                     |         |
| <b>Fried Food</b>    |                       |                                            |                     |         |
| Low consumption      | 221                   | 124 (56.1)                                 | 2.212               | 0.137   |
| High consumption     | 19                    | 14 (73.7)                                  |                     |         |
| <b>Sweet</b>         |                       |                                            |                     |         |
| Low consumption      | 167                   | 92 (55.1)                                  | 1.392               | 0.238   |
| High consumption     | 76                    | 48 (63.2)                                  |                     |         |
| <b>Grains</b>        |                       |                                            |                     |         |
| Low consumption      | 41                    | 27 (65.9)                                  | 1.353               | 0.245   |
| High consumption     | 200                   | 112 (56.0)                                 |                     |         |
| <b>Cereal</b>        |                       |                                            |                     |         |
| Low consumption      | 198                   | 116 (58.6)                                 | 0.795               | 0.372   |
| High consumption     | 43                    | 22 (51.2)                                  |                     |         |
| <b>White Meat</b>    |                       |                                            |                     |         |
| Low consumption      | 167                   | 101 (60.5)                                 | 2.301               | 0.129   |
| High consumption     | 74                    | 37 (50.0)                                  |                     |         |
| <b>Soft Drink</b>    |                       |                                            |                     |         |
| Low consumption      | 225                   | 130 (57.8)                                 | 0.014               | 0.905   |

|                           |     |                  |              |              |
|---------------------------|-----|------------------|--------------|--------------|
| High consumption          | 16  | 9 (56.3)         |              |              |
| <b>Snack</b>              |     |                  |              |              |
| Low consumption           | 235 | 135 (57.4)       | 0.103        | 0.748        |
| High consumption          | 3   | 2 (66.7)         |              |              |
| <b>Alcoholic Beverage</b> |     |                  |              |              |
| Low consumption           | 136 | <b>68 (50.0)</b> | <b>7.135</b> | <b>0.008</b> |
| High consumption          | 109 | <b>73 (67.0)</b> |              |              |
| <b>Smoking</b>            |     |                  |              |              |
| Non-Smoker                | 229 | 131 (57.2)       | 0.365        | 0.546        |
| Smoker                    | 17  | 11 (64.7)        |              |              |
| <b>Physical Activity</b>  |     |                  |              |              |
| Less active               | 53  | 35 (58.3)        |              |              |
| Moderately active         | 128 | 40 (63.5)        | 1.401        | 0.496        |
| High active               | 65  | 67 (54.5)        |              |              |

Table 3 presents the magnitude of associations between high sedentary behavior and variables with a p-value  $\leq 0.200$  in chi-square analysis. No significant relationship was observed after adjustment for confounding factors (sex, age, and socioeconomic status).

**Table 3.** Multivariable-adjusted odds ratios and 95% CIs for association between high sedentary behavior and independent variables in teachers.

|                           | OR   | 95%CI      | p     |
|---------------------------|------|------------|-------|
| <b>Fruit</b>              |      |            |       |
| Low consumption           | 1.00 | Reference  | -     |
| High consumption          | 0.84 | 0.48; 1.46 | 0.534 |
| <b>Fried Food</b>         |      |            |       |
| Low consumption           | 1.00 | Reference  | -     |
| High consumption          | 1.54 | 0.51; 4.63 | 0.445 |
| <b>White Meat</b>         |      |            |       |
| Low consumption           | 1.00 | Reference  | -     |
| High consumption          | 0.67 | 0.38; 1.20 | 0.179 |
| <b>Alcoholic Beverage</b> |      |            |       |
| Low consumption           | 1.00 | Reference  | -     |
| High consumption          | 1.63 | 0.95; 2.81 | 0.076 |

Adjusted for sex, age, and socioeconomic status. OR=Odds Ratio; 95%CI= 95% Confidence Interval.



Table 4 shows the associations of breaks in sedentary behavior at work and at leisure time with dietary and lifestyle habits. High breaks in sedentary behavior were reported by 67.7% of sample in the work domain and 70.2% at leisure time. It was observed that teachers with high breaks in sedentary behavior at work were almost twice as likely to have high consumption of dairy products, 2.5 times more likely to have high consumption of cereals and 2.6 times more likely to be moderately and high active. When considering breaks in sedentary behavior at leisure time, teachers who reported high sedentary breaks were more likely to have high consumption of fruits and vegetables, and more likely to be high actives. The correlation coefficient between breaks at work and breaks at leisure time was 0,408 (p-value for Spearman = 0.001). According to sedentary time, the amount of breaks at work was correlated to computer use ( $r= 0.126$ ,  $p=0.049$ ), cell phone/tablet ( $r=0.171$ ,  $p=0.007$ ), and sitting time ( $r= -0.185$ ,  $p=0.007$ ). No correlation between breaks at home and domains of sedentary behavior was observed in Spearman Correlation Coefficient test.

**Table 4.** Multivariable-adjusted odds ratios and 95% CIs for association between high breaks in sedentary behavior with dietary and lifestyle habits in public school teachers.

|                      | High Breaks in SB at Work<br>(n=166) |                  |              | High Breaks in SB at Leisure<br>time (n=172) |                  |              |
|----------------------|--------------------------------------|------------------|--------------|----------------------------------------------|------------------|--------------|
|                      | OR                                   | 95%CI            | P            | OR                                           | 95%CI            | P            |
| <b>Fruit</b>         |                                      |                  |              |                                              |                  |              |
| Low consumption      | 1.00                                 | Reference        | -            | 1.00                                         | Reference        | -            |
| High consumption     | 1.62                                 | 0.90-2.92        | 0.108        | <b>2.33</b>                                  | <b>1.28-4.23</b> | <b>0.005</b> |
| <b>Vegetable</b>     |                                      |                  |              |                                              |                  |              |
| Low consumption      | 1.00                                 | Reference        | -            | 1.00                                         | Reference        | -            |
| High consumption     | 1.63                                 | 0.89-3.01        | 0.116        | <b>1.91</b>                                  | <b>1.05-3.49</b> | <b>0.035</b> |
| <b>Dairy Product</b> |                                      |                  |              |                                              |                  |              |
| Low consumption      | 1.00                                 | Reference        | -            | 1.00                                         | Reference        | -            |
| High consumption     | <b>1.93</b>                          | <b>1.07-3.51</b> | <b>0.029</b> | 1.36                                         | 0.76-2.44        | 0.298        |
| <b>Fried Food</b>    |                                      |                  |              |                                              |                  |              |
| Low consumption      | 1.00                                 | Reference        | -            | 1.00                                         | Reference        | -            |
| High consumption     | 0.89                                 | 0.29-2.73        | 0.838        | 0.94                                         | 0.32-2.73        | 0.947        |

|                           |             |                  |              |             |                  |              |  |
|---------------------------|-------------|------------------|--------------|-------------|------------------|--------------|--|
| <b>Sweet</b>              |             |                  |              |             |                  |              |  |
| Low consumption           | 1.00        | Reference        | -            | 1.00        | Reference        | -            |  |
| High consumption          | 1.10        | 0.60-2.05        | 0.743        | 1.21        | 0.65-2.24        | 0.541        |  |
| <b>Grains</b>             |             |                  |              |             |                  |              |  |
| Low consumption           | 1.00        | Reference        | -            | 1.00        | Reference        | -            |  |
| High consumption          | 1.77        | 0.87-3.58        | 0.115        | 1.11        | 0.53-2.33        | 0.773        |  |
| <b>Soft Drink</b>         |             |                  |              |             |                  |              |  |
| Low consumption           | 1.00        | Reference        | -            | 1.00        | Reference        | -            |  |
| High consumption          | 0.67        | 0.21-2.19        | 0.518        | 0.48        | 0.16-1.44        | 0.193        |  |
| <b>Cereal</b>             |             |                  |              |             |                  |              |  |
| Low consumption           | 1.00        | Reference        | -            | 1.00        | Reference        | -            |  |
| High consumption          | <b>2.49</b> | <b>1.05-5.92</b> | <b>0.038</b> | 2.04        | 0.87-4.80        | 0.100        |  |
| <b>White Meat</b>         |             |                  |              |             |                  |              |  |
| Low consumption           | 1.00        | Reference        | -            | 1.00        | Reference        | -            |  |
| High consumption          | 0.61        | 0.33-1.13        | 0.120        | 1.14        | 0.61-2.12        | 0.678        |  |
| <b>Alcoholic Beverage</b> |             |                  |              |             |                  |              |  |
| Low consumption           | 1.00        | Reference        | -            | 1.00        | Reference        | -            |  |
| High consumption          | 0.97        | 0.55-1.72        | 0.929        | 0.95        | 0.53-1.68        | 0.951        |  |
| <b>Smoking</b>            |             |                  |              |             |                  |              |  |
| Low consumption           | 1.00        | Reference        | -            | 1.00        | Reference        | -            |  |
| High consumption          | 1.00        | 0.32-3.08        | 0.995        | 0.84        | 0.30-2.41        | 0.751        |  |
| <b>Physical Activity</b>  |             |                  |              |             |                  |              |  |
| Less active               | 1.00        | Reference        | -            | 1.00        | Reference        | -            |  |
| Moderately active         | <b>2.60</b> | <b>1.28-5.28</b> | <b>0.008</b> | 1.75        | 0.87-3.55        | 0.116        |  |
| High Active               | <b>2.57</b> | <b>1.14-5.77</b> | <b>0.022</b> | <b>2.34</b> | <b>1.03-5.35</b> | <b>0.043</b> |  |

Adjusted for sex, age, and socioeconomic level. OR=Odds Ratio; 95%CI= 95% Confidence Interval.

Table 5 presents a clustering association analysis of different patterns of sedentary behavior with dietary and lifestyle habits of public-school teachers. Teachers with high sedentary behavior, but with high sedentary breaks at work and leisure (group 2) were 3.38 times more likely to have high consumption of fruits than those teachers with high sedentary behavior and low sedentary breaks (group 1). The odds to have high consumption of fruits was also higher among teachers with low sedentary behavior (group 3) when compared to the first group. Teachers located into group 2 were 3.6 times more likely to have high consumption of dairy products and 2.3 times more likely to be highly active when compared to group 1. These results were observed independently of sex, age, and socioeconomic status.

**Table 5.** Multivariable-adjusted odds ratios and 95% CIs for clustering association of different sedentary behavior patterns with independent variables in public school teachers

|                                   | Group 1<br>High SB + Low Breaks<br>(n=65) |           |         | Group 2<br>High SB + High Breaks<br>(n=77) |                    |              | Group 3<br>Low SB<br>(n=103) |                   |              |
|-----------------------------------|-------------------------------------------|-----------|---------|--------------------------------------------|--------------------|--------------|------------------------------|-------------------|--------------|
|                                   | OR                                        | 95% CI    | p-value | OR                                         | 95% CI             | p-value      | OR                           | 95% CI            | p-value      |
| High consumption of Fruit         | 1.00                                      | Reference | -       | <b>3.38</b>                                | <b>1.61; 7.10</b>  | <b>0.001</b> | <b>2.24</b>                  | <b>1.14; 4.42</b> | <b>0.020</b> |
| High consumption of Vegetable     | 1.00                                      | Reference | -       | 1.90                                       | 0.90; 4.01         | 0.091        | 1.38                         | 0.69; 2.73        | 0.362        |
| High consumption of Dairy product | 1.00                                      | Reference | -       | 1.92                                       | 0.94; 3.91         | 0.072        | 1.64                         | 0.85; 3.19        | 0.142        |
| High consumption of Fried food    | 1.00                                      | Reference | -       | 0.76                                       | 0.24; 2.42         | 0.636        | 0.59                         | 0.17; 1.42        | 0.188        |
| High consumption of Sweet         | 1.00                                      | Reference | -       | 1.49                                       | 0.72; 3.07         | 0.284        | 0.99                         | 0.49; 2.01        | 0.971        |
| High consumption of Grains        | 1.00                                      | Reference | -       | 1.48                                       | 0.63; 3.50         | 0.363        | 2.13                         | 0.93; 4.91        | 0.076        |
| High consumption of Cereal        | 1.00                                      | Reference | -       | <b>3.59</b>                                | <b>1.19; 10.86</b> | <b>0.024</b> | 2.81                         | 0.97; 8.17        | 0.057        |
| High consumption of White meat    | 1.00                                      | Reference | -       | 0.83                                       | 0.39; 1.79         | 0.635        | 1.36                         | 0.67; 2.73        | 0.394        |
| High consumption of Soft drink    | 1.00                                      | Reference | -       | 0.37                                       | 0.09; 1.59         | 0.182        | 0.85                         | 0.25; 2.91        | 0.791        |
| High consumption of Snack         | 1.00                                      | Reference | -       | 0.83                                       | 0.05; 14.08        | 0.899        | 0.82                         | 0.05; 14.13       | 0.892        |
| High consumption of Alcohol       | 1.00                                      | Reference | -       | 1.09                                       | 0.55; 2.16         | 0.803        | 0.64                         | 0.33; 1.24        | 0.186        |
| Be a smoker                       | 1.00                                      | Reference | -       | 1.06                                       | 0.30; 3.73         | 0.927        | 0.99                         | 0.28; 3.51        | 0.987        |
| Be high active*                   | 1.00                                      | Reference | -       | <b>2.34</b>                                | <b>1.05; 5.22</b>  | <b>0.037</b> | 1.84                         | 0.84; 4.04        | 0.128        |

Analysis adjusted by sex, age, and socioeconomic status. High SB= Sedentary behavior of 8 and more hours/day; Low SB= Sedentary behavior below 8 hours/day; Low Breaks= reported to break sedentary behavior never, rarely, or sometimes for both work and leisure time domains; High Breaks= reported to break sedentary behavior often or always for both work and leisure time domains. \*4<sup>th</sup> quartile of Baecke's score. Bold values are statistically significant.

## DISCUSSION

The present study observed a prevalence of 58% of high sedentary behavior in public school teachers. However, teachers with high breaks in sedentary behavior were associated with better dietary habits and physical activity, even among those with high sedentary behavior, independently of sex, age, and socioeconomic status.

The sample of the present study was composed in majority by females (76%), which appears to be a trend in the area of basic education. This could be a reflection of the insertion of women in the work environment, from the second half of the twentieth century, especially in functions of teaching and nursing, considered as care functions and an extension of domestic activities (Cardoso et al., 2009)<sup>13</sup>. It should be highlighted that, according to UNESCO (2004)<sup>29</sup>, the prevalence of Brazilian female teachers is 81.3%, being even higher than in this present study.

The majority of females in the study sample revealed a possible common scenario for other studies involving teachers; the presence of double tasks (school and domestic). This factor may be responsible for the decrease in women's health, leading to insufficient time for leisure, rest, and hours of sleep, which would imply high levels of stress, less time to perform physical activities, and a greater probability of alcohol consumption (Vedovato & Monteiro, 2014)<sup>12</sup>. The prevalence of alcohol consumption was high in the sample (44.4%). Therefore, the peculiarities of teaching career, coupled with the double tasks of women, may suggest reasons for the high consumption of alcoholic beverages, being further aggravated by the report of association of sedentary behavior with alcohol consumption and unhealthy dietary pattern in previous study (Pearson & Biddle, 2011)<sup>30</sup>. These findings meet the results of the present study, once teachers with high alcohol consumption showed higher prevalence of high sedentary behavior than teachers with low alcohol consumption (67.0% vs. 50.0%). It was also

1  
2  
3 observed that alcohol consumption associated with television viewing time were factors  
4 that encourage excessive eating (Chapman et al., 2012)<sup>31</sup>, which may impair even more  
5 the dietary habits of teachers with high sedentary behavior and high alcohol  
6 consumption over time.  
7  
8  
9  
10

11  
12 In the present study, teachers with high breaks in sedentary behavior at work  
13 were more likely to have high consumption of dairy products and cereals, and more  
14 likely to be physically active. Regarding breaks in sedentary behavior at leisure time,  
15 teachers who report high breaks in this domain were more likely to have high  
16 consumption of fruits and vegetables, and more likely to be physically active.  
17  
18 Convergenly with healthy eating habits as observed, the frequent sedentary breaks at  
19 work and leisure have been associated to lower metabolic risk, in regard adiposity  
20 triglyceride levels (Healy et al., 2008)<sup>32</sup>. Another important factor is breaks in sedentary  
21 behavior may be performed even by light intensity activities and it is known that light  
22 intensity physical activity increases the metabolic rate and the energy cost of daily  
23 activities, which can significantly contribute to increase energy expenditure (Pate,  
24 O'Neil & Lobelo, 2008)<sup>33</sup>. By this way, teachers with higher physical activity practice,  
25 even in light intensity, may present greater physical fitness to withstand physiological  
26 workloads than those who were predominantly sedentary, and may perceive the  
27 standing time along the teaching activities as less intensely (Dias et al., 2017)<sup>14</sup>.  
28  
29  
30  
31  
32  
33  
34  
35  
36  
37  
38  
39  
40  
41  
42  
43  
44  
45  
46

47 The present study compared the dietary habits according to groups with different  
48 sedentary behavior patterns. The high breaks in sedentary behavior contributes to an  
49 increase in the chance of high consumption of fruits and cereals even among teachers  
50 with high sedentary behavior. A possible hypothesis is that breaks in sedentary time  
51 may provide opportunities to have more access to healthy food choices, which are not  
52 always available in the sedentary setting, whether at work or at leisure. Another  
53  
54  
55  
56  
57  
58  
59  
60

1  
2  
3 hypothesis is the fragmentation of sedentary behavior may mitigate the influence of  
4  
5 sedentary behavior on unhealthy dietary habits.  
6  
7

8 High breaks in sedentary behavior was also associated to higher chance of be  
9  
10 high active among teachers with high sedentary behavior, which was not observed in  
11  
12 teachers with low sedentary behavior. This observation reinforces the concept that  
13  
14 sedentary behavior and sufficient levels of physical activity were not an inverse of each  
15  
16 other (Van der Ploeg & Hillsdon, 2017)<sup>34</sup>. Besides that, breaks in sedentary behavior  
17  
18 may lead to better healthy habits as healthy foods consumption and physical activity  
19  
20 engaging even among those with high sedentary behavior.  
21  
22

23 The present study is limited by its cross-sectional design, which prevents the  
24  
25 analysis of cause and effect. The self-report assessment of variables is another factor to  
26  
27 be considered and may be vulnerable to biases. Sitting time was assessed in overall and  
28  
29 its measurement in different domains will provide major inferences. Besides , due to the  
30  
31 present study assess only teachers, the inference about lifestyle behaviors of other  
32  
33 workers is another important limitation, which does not allow to compare different  
34  
35 groups of workers in regard the same variables and consequently to extrapolate the  
36  
37 findings to other populations. Another important limitation was the lack of assessment  
38  
39 about how many servings per day was consumed for each food, being assessed only the  
40  
41 frequency in days per week. Otherwise, advancements in this study were the assessment  
42  
43 of the different sedentary patterns in a specific and important category of workers, who  
44  
45 perform light intensity physical activities during almost all their work time, where most  
46  
47 studies concentrate their efforts and investigation how sedentary behavior and lifestyle  
48  
49 habits are associated. It should also be noted that data collection was performed face-to-  
50  
51 face survey and anthropometry was objectively measured in the workplace, which  
52  
53 allows higher veracity of information.  
54  
55  
56  
57  
58  
59  
60

1  
2  
3 In conclusion, this study observed no independent association of sedentary  
4 behavior with dietary habits and lifestyle factors among teachers, however, high breaks  
5 in sedentary behavior was associated with healthier dietary habits (i.e. high  
6 consumption of fruits, vegetables, dairy products, and cereals) and with high levels of  
7 physical activity. These positive results were observed even among teachers with high  
8 levels of sedentary behavior, when compared to those with high sedentary behavior and  
9 low breaks in sedentary behavior. Further investigation are needed to extrapolate these  
10 results to other types of workers and to analyze these associations over the time.  
11 However, evidence-based information about teachers is helpful to lead positive  
12 behavioral health changes of this large sample of workers, as well as to all the people  
13 who are dependent on their professional acting.  
14  
15  
16  
17  
18  
19  
20  
21  
22  
23  
24  
25  
26  
27  
28  
29

## 30 **DECLARATIONS**

### 31 **Ethics approval and consent to participate**

32  
33  
34 All procedures performed in studies involving human participants were in  
35 accordance with the ethical standards of the institutional and/or national research  
36 committee and with the 1964 Helsinki declaration and its later amendments or  
37 comparable ethical standards. Informed consent was obtained from all individual  
38 participants included in this study. The Research Ethics Committee Involving Human  
39 Beings of UNESP - São Paulo State University approved this study (Protocol:  
40 72191717.9.0000.5402).  
41  
42  
43  
44  
45  
46  
47  
48  
49  
50

### 51 **Patient Consent for publication**

52 Not applicable.  
53  
54  
55  
56

### 57 **Availability of data and materials**

1  
2  
3 Data of survey are not publicly available aiming to preserve anonymity of  
4 information from participants.  
5  
6  
7

### 8 **Competing interests** 9

10  
11 The authors declare that they have no competing interests.  
12  
13

### 14 **Funding** 15

16  
17  
18 This study is funded in part by the CAPES – *Coordenação de Aperfeiçoamento*  
19 *de Pessoal de Nível Superior* (Finance Code 001).  
20  
21  
22

### 23 **Authors' contributions** 24

25  
26  
27 We declare that all authors named in this paper: Leandro Dragueta Delfino;  
28 William Rodrigues Tebar; Fernanda Caroline Staquellini Gil Tebar; Jefferson Marinho  
29 de Souza; Marcelo Romanzini; Rômulo Araújo Fernandes and Diego Giulliano Destro  
30 Christofaro participated in the present study based on the following criteria about  
31 authorship recommendations:  
32  
33  
34  
35

36  
37 - Substantial contributions to the conception or design of the work (LDD, WRT,  
38 DGDC, MR, RAF);  
39  
40

41  
42 - Data collection (LDD, JMS, FCSGT, WRT)  
43  
44

45 - Data analysis and/or interpretation of data for the work (LDD, WRT, DGDC)  
46  
47

48 - Drafting the work or revising it critically for important intellectual content (LDD,  
49 WRT, DGDC, MR, RAF);  
50  
51

52  
53 - Final approval of the version to be published (all the authors);  
54  
55

56 - Agreement to be accountable for all aspects of the work in ensuring that questions  
57 related to the accuracy or integrity of any part of the work are appropriately investigated  
58 and resolved (all the authors).  
59  
60



## Acknowledgements

The authors would like to thank the Education Department of Presidente Prudente for the authorization to conduct the research procedures in the schools, the Managers of the schools which allowed that teachers were evaluated, and for the teachers who agreed to participate in the research.

## REFERENCES

1. Compernelle S, De Cocker K, Teixeira PJ, et al. The associations between domain-specific sedentary behaviours and dietary habits in European adults: a cross-sectional analysis of the SPOTLIGHT survey. *BMC Public Health* 2016;16:1057-66.
2. Chastin SFM, Egerton T, Leask C, et al. Meta-Analysis of the relationship between breaks in sedentary behavior and cardiometabolic health. *Obesity* 2015;23:1800-10.
3. World Health Organization. *Physical inactivity: a global public health problem*. Geneva: World Health Organization, 2008.
4. Nam JY, Kim J, Cho KH, et al. Associations of sitting time and occupation with metabolic syndrome in South Korean adults: a cross-sectional study. *BMC Public Health* 2016;16:943-53.
5. Healy GN, Clark BK, Winkler EAH, et al. Measurement of adults' sedentary time in population-based studies. *Am J Prev Med* 2011; 41:216-27.
6. Thorp AA, Healy GN, Winkler E, et al. Prolonged sedentary time and physical activity in workplace and non-work contexts: a cross-sectional study of office, customer service and call centre employees. *Int J Behav Nutr Phys Act* 2012;9:128.
7. Ryan CG, Dall PM, Granat MH, et al. Sitting patterns at work: objective measurement of adherence to current recommendations. *Ergonomics* 2011;54:531-8.
8. Hadgraft NT, Lynch BM, Clark BK, et al. Excessive sitting at work and at home: Correlates of occupational sitting and TV viewing time in working adults. *BMC Public Health* 2015;15:899-912.
9. Maia EG, Gomes FMD, Alves MH, et al. Hábito de assistir à televisão e sua relação com a alimentação: resultados do período de 2006 a 2014 em capitais brasileiras. *Cad. Saúde Pública* 2016;32:1-14.

10. Hsueh MC, Rutherford R, Huang YH, et al. Are older adults without a healthy diet less physically active and more sedentary? *Nutrients* 2019;11(5):1119. Published 2019 May 20. doi: 10.3390/nu11051119.
11. De Araújo DSMS, De Araújo CGS. Aptidão física, saúde e qualidade de vida relacionada à saúde em adultos. *RevBrasMed Esporte* 2000;6:194-203.
12. Vedovato TG, Monteiro I. Health conditions and factors related to the work ability of teachers. *Industrial Health* 2014;52:121–28.
13. Cardoso JP, Ribeiro IQB, Araújo TM, et al. Prevalência de dor musculoesquelética em professores. *RevBrasEpidemiol* 2009;12:604-14.
14. Dias DF, Loch MR, González AD, et al. Atividade física insuficiente no tempo livre e fatores ocupacionais em professores de escolas públicas. *Rev Saude Pub* 2017;51:68.
15. Vaz M, Bharathi AV. How sedentary are people in ‘sedentary’ occupations? The physical activity of teachers in urban South India. *Occupational Medicine* 2004;54:369-72.
16. Farahmand BY, Persson P-G, Michaëlsson K, et al., for the Swedish Hip Fracture Study Group. Physical activity and hip fracture: a population-based case-control study. *Int J Epidemiol* 2000;29:308-14.
17. Saidj M, Menai M, Charreire H, et al. Descriptive study of sedentary behaviours in 35,444 French working adults: cross-sectional findings from the ACTI-Cités study. *BMC Public Health* 2015;15: 379-89.
18. Owen N, Sparling ED, Healy GN, et al. Sedentary Behavior: emerging evidence for a new health risk. *Mayo Clin Proc* 2010; 85:1138-41.
19. Brazilian Institute of Geography and Statistics. Municipal Human Development Index 2010. Retrieved Jun 14, 2017, from: <https://cidades.ibge.gov.br/brasil/sp/presidente-prudente/panorama>.
20. Agranonik M, Hirakata VN. Cálculo de tamanho de amostra: proporções. *Revista HCPA* 2011;31:382-88.
21. Rosenberg DE, Norman GJ, Wagner N, et al. Reliability and Validity of the Sedentary Behavior Questionnaire (SBQ) for Adults. *Journal of Physical Activity and Health* 2010;7(6):697-705. Retrieved Dec 27, 2019, from <https://journals.humankinetics.com/view/journals/jpah/7/6/article-p697.xml>.
22. Van der Ploeg HP, Chey T, Korda RJ, et al. Sitting time and all-cause mortality risk in 222,497 Australian adults. *Arch Intern Med* 2012;172:494-500.
23. World Health Organization. WHO Technical Report Series. Obesity: preventing and managing the global epidemic: report of a WHO consultation. Geneva, 2000.

- 1
- 2
- 3 24. Surveillance System for Risk and Protective Factors for Chronic Diseases by
- 4 Telephone Survey. Ministry of Health, Brazil. 2017. Retrieved from:
- 5 [https://bvsmms.saude.gov.br/bvs/publicacoes/vigitel\\_brasil\\_2017\\_vigilancia\\_fatores](https://bvsmms.saude.gov.br/bvs/publicacoes/vigitel_brasil_2017_vigilancia_fatores_riscos.pdf)
- 6 [\\_riscos.pdf](https://bvsmms.saude.gov.br/bvs/publicacoes/vigitel_brasil_2017_vigilancia_fatores_riscos.pdf).
- 7
- 8
- 9 25. Galduróz JCF, Noto AR, Nappo AS, et al. I Levantamento domiciliar nacional
- 10 sobre o uso de drogas psicotrópicas: estudo envolvendo as 24 maiores cidades do
- 11 estado de São Paulo. São Paulo: CEBRID/Unifesp; 1999.
- 12
- 13
- 14 26. Conner TS, Brookie KL, Carr AC, et al. Let them eat fruit! The effect of fruit and
- 15 vegetable consumption on psychological well-being in young adults: A
- 16 randomized controlled trial. *PLoS One* 2017;12(2):e0171206. Published 2017 Feb
- 17 3. doi:10.1371/journal.pone.0171206.
- 18
- 19
- 20 27. Baecke JA, Burema J, Frijters JE. A short questionnaire for the measurement of
- 21 habitual physical activity in epidemiological studies. *The American Journal of*
- 22 *Clinical Nutrition* 1982;36:936- 42.
- 23
- 24
- 25 28. Brazilian Criteria for Economic Classification. Brazilian Institute of Public
- 26 Opinion and Statistics. 2015. Retrieved 27 Dec, 2019, from:
- 27 <http://www.abep.org/Servicos/Download.aspx?id=11>.
- 28
- 29
- 30 29. United Nations for Education Science and Culture Organization- UNESCO. O
- 31 Perfil dos professores brasileiros: o que fazem, o que pensam, o que almejam —
- 32 Pesquisa Nacional UNESCO. [Profile of Brazilian teachers: what they do, what
- 33 they think, what they crave – National Survey] Sao Paulo: Moderna, 2004.
- 34
- 35 30. Pearson N, Biddle SJH. Sedentary behavior and dietary intake in children,
- 36 adolescents, and adults: A systematic review. *Am J Prev Med* 2011;41:178-88.
- 37
- 38 31. Chapman CD, Benedict C, Brooks SJ, et al. Lifestyle determinants of the drive to
- 39 eat: a meta-analysis. *Am J Clin Nutr* 2012;96:492-7.
- 40
- 41 32. Healy GN, Dunstan DW, Salmon J, et al. Breaks in sedentary time – beneficial
- 42 associations with metabolic risk. *Diabetes Care* 2008;31:661-6.
- 43
- 44 33. Pate RR, O’Neil JR, Lobelo F. The evolving definition of sedentary. *Exercise and*
- 45 *Sport Sciences Reviews* 2008;36:173-8.
- 46
- 47 34. Van der Ploeg HP, Hillsdon M. Is sedentary behaviour just physical inactivity by
- 48 another name?. *Int J Behav Nutr Phys Act* 2017;14(1):142. Published 2017 Oct 23.
- 49 doi:10.1186/s12966-017-0601-0
- 50
- 51
- 52
- 53
- 54
- 55
- 56
- 57
- 58
- 59
- 60

1  
2  
3  
4  
5  
6  
7  
8  
9  
10  
11  
12  
13  
14  
15  
16  
17  
18  
19  
20  
21  
22  
23  
24  
25  
26  
27  
28  
29  
30  
31  
32  
33  
34  
35  
36  
37  
38  
39  
40  
41  
42  
43  
44  
45  
46  
47  
48  
49  
50  
51  
52  
53  
54  
55  
56  
57  
58  
59  
60STROBE Statement—Checklist of items that should be included in reports of *cross-sectional studies*

|                              | Item No | Recommendation                                                                                                                                                                                    | Page           |
|------------------------------|---------|---------------------------------------------------------------------------------------------------------------------------------------------------------------------------------------------------|----------------|
| <b>Title and abstract</b>    | 1       | (a) Indicate the study's design with a commonly used term in the title or the abstract                                                                                                            | 2              |
|                              |         | (b) Provide in the abstract an informative and balanced summary of what was done and what was found                                                                                               | 2              |
| <b>Introduction</b>          |         |                                                                                                                                                                                                   |                |
| Background/rationale         | 2       | Explain the scientific background and rationale for the investigation being reported                                                                                                              | 4,5            |
| Objectives                   | 3       | State specific objectives, including any prespecified hypotheses                                                                                                                                  | 5,6            |
| <b>Methods</b>               |         |                                                                                                                                                                                                   |                |
| Study design                 | 4       | Present key elements of study design early in the paper                                                                                                                                           | 6              |
| Setting                      | 5       | Describe the setting, locations, and relevant dates, including periods of recruitment, exposure, follow-up, and data collection                                                                   | 7              |
| Participants                 | 6       | (a) Give the eligibility criteria, and the sources and methods of selection of participants                                                                                                       | 6              |
| Variables                    | 7       | Clearly define all outcomes, exposures, predictors, potential confounders, and effect modifiers. Give diagnostic criteria, if applicable                                                          | 7-10           |
| Data sources/<br>measurement | 8*      | For each variable of interest, give sources of data and details of methods of assessment (measurement). Describe comparability of assessment methods if there is more than one group              | 7-11           |
| Bias                         | 9       | Describe any efforts to address potential sources of bias                                                                                                                                         | 11             |
| Study size                   | 10      | Explain how the study size was arrived at                                                                                                                                                         | 7              |
| Quantitative variables       | 11      | Explain how quantitative variables were handled in the analyses. If applicable, describe which groupings were chosen and why                                                                      | 11             |
| Statistical methods          | 12      | (a) Describe all statistical methods, including those used to control for confounding                                                                                                             | 11             |
|                              |         | (b) Describe any methods used to examine subgroups and interactions                                                                                                                               | 11             |
|                              |         | (c) Explain how missing data were addressed                                                                                                                                                       | Not applicable |
|                              |         | (d) If applicable, describe analytical methods taking account of sampling strategy                                                                                                                | 11             |
|                              |         | (e) Describe any sensitivity analyses                                                                                                                                                             | Not applicable |
| <b>Results</b>               |         |                                                                                                                                                                                                   |                |
| Participants                 | 13*     | (a) Report numbers of individuals at each stage of study—eg numbers potentially eligible, examined for eligibility, confirmed eligible, included in the study, completing follow-up, and analysed | 12             |
|                              |         | (b) Give reasons for non-participation at each stage                                                                                                                                              | Not applicable |
|                              |         | (c) Consider use of a flow diagram                                                                                                                                                                | Not applicable |
| Descriptive data             | 14*     | (a) Give characteristics of study participants (eg demographic, clinical, social) and information on exposures and potential                                                                      | 12             |

|                          |     |                                                                                                                                                                                                              |                |
|--------------------------|-----|--------------------------------------------------------------------------------------------------------------------------------------------------------------------------------------------------------------|----------------|
|                          |     | confounders                                                                                                                                                                                                  |                |
|                          |     | (b) Indicate number of participants with missing data for each variable of interest                                                                                                                          |                |
| Outcome data             | 15* | Report numbers of outcome events or summary measures                                                                                                                                                         | 12             |
| Main results             | 16  | (a) Give unadjusted estimates and, if applicable, confounder-adjusted estimates and their precision (eg, 95% confidence interval). Make clear which confounders were adjusted for and why they were included | 12-18          |
|                          |     | (b) Report category boundaries when continuous variables were categorized                                                                                                                                    | -              |
|                          |     | (c) If relevant, consider translating estimates of relative risk into absolute risk for a meaningful time period                                                                                             | -              |
| Other analyses           | 17  | Report other analyses done—eg analyses of subgroups and interactions, and sensitivity analyses                                                                                                               | Not applicable |
| <b>Discussion</b>        |     |                                                                                                                                                                                                              |                |
| Key results              | 18  | Summarise key results with reference to study objectives                                                                                                                                                     | 19             |
| Limitations              | 19  | Discuss limitations of the study, taking into account sources of potential bias or imprecision. Discuss both direction and magnitude of any potential bias                                                   | 21             |
| Interpretation           | 20  | Give a cautious overall interpretation of results considering objectives, limitations, multiplicity of analyses, results from similar studies, and other relevant evidence                                   | 22             |
| Generalisability         | 21  | Discuss the generalisability (external validity) of the study results                                                                                                                                        | 22             |
| <b>Other information</b> |     |                                                                                                                                                                                                              |                |
| Funding                  | 22  | Give the source of funding and the role of the funders for the present study and, if applicable, for the original study on which the present article is based                                                | 23             |

\*Give information separately for exposed and unexposed groups.

**Note:** An Explanation and Elaboration article discusses each checklist item and gives methodological background and published examples of transparent reporting. The STROBE checklist is best used in conjunction with this article (freely available on the Web sites of PLoS Medicine at <http://www.plosmedicine.org/>, Annals of Internal Medicine at <http://www.annals.org/>, and Epidemiology at <http://www.epidem.com/>). Information on the STROBE Initiative is available at [www.strobe-statement.org](http://www.strobe-statement.org).
